1 POLLUTANTS AND INSECTICIDES DRIVE LOCAL ADAPTATION IN AFRICAN  
2 MALARIA MOSQUITOES  
3  
4  
5  
6

7 Colince Kamdem<sup>1\*</sup>, Caroline Fouet<sup>1</sup>, Stephanie Gamez<sup>1</sup>, Bradley J. White<sup>1,2,\*</sup>  
8

9 <sup>1</sup>Department of Entomology, University of California, Riverside, CA 92521  
10

11 <sup>2</sup>Center for Disease Vector Research, Institute for Integrative Genome Biology,  
12 University of California, Riverside, CA 92521  
13

14 \*Corresponding authors: [guy.kamdmdjoko@ucr.edu](mailto:guy.kamdmdjoko@ucr.edu); [bwhite@ucr.edu](mailto:bwhite@ucr.edu)  
15  
16  
17

18 ABSTRACT

19

20 Urbanization presents unique environmental challenges to human commensal  
21 species. The Afrotropical *Anopheles gambiae* complex contains a number of  
22 synanthropic mosquito species that are major vectors of malaria. To examine  
23 ongoing cryptic diversification within the complex, we performed reduced  
24 representation sequencing on 941 mosquitoes collected across four  
25 ecogeographic zones in Cameroon. We find evidence for clear subdivision within  
26 *An. coluzzii* and *An. gambiae* s.s. – the two most significant malaria vectors in  
27 the region. Importantly, in both species rural and urban populations of  
28 mosquitoes were genetically differentiated. Genome scans of cryptic subgroups  
29 reveal pervasive signatures of selection centered on genes involved in xenobiotic  
30 resistance. Notably, a selective sweep containing eight detoxification enzymes is  
31 unique to urban mosquitoes that exploit polluted breeding sites. Overall, our  
32 study reveals that anthropogenic environmental modification is driving population  
33 differentiation and local adaptation in African malaria mosquitoes with potentially  
34 significant consequences for malaria epidemiology.

35

36 INTRODUCTION

37

38 In species occupying ecologically heterogeneous ranges, natural selection  
39 can drive local adaptation, increasing mean individual fitness and promoting  
40 biological diversification [1, 2]. Contemporary anthropogenic alteration of the  
41 landscape may be increasing pressure for local adaptation in diverse taxa [3].  
42 For example, the rise of urban centers over the past two centuries has presented  
43 unique challenges to human-commensal species, often necessitating the rapid  
44 evolution of resistance to pollutants and pesticides [4-6]. Successful local  
45 adaptation requires that selection overcome the homogenizing effect of gene flow  
46 from nearby populations [7]. Theoretical simulations suggest that such  
47 divergence with gene flow can occur under a range of conditions [8], although the  
48 most likely genomic distribution of the underlying adaptive variants remains  
49 unclear [9, 10]. Studies of populations in the earliest stages of ecological  
50 divergence should help elucidate the conditions needed for local adaptation and  
51 relevant targets of natural selection [11].

52 The Afrotropical *Anopheles gambiae* complex is a group of at least nine  
53 isomorphic mosquito species exhibiting varying degrees of geographic and  
54 reproductive isolation [12-14]. Owing to the critical role its members play in  
55 sustaining malaria transmission, a wealth of genomic data exists on the complex  
56 including whole genome assemblies for most of the species [15, 16]. Because  
57 radiation of the complex began ~1.85 mya, interspecific genetic comparisons will  
58 yield little insight into the establishment of divergence with gene flow. However,  
59 both ecological and genetic evidence suggests that contemporary local

60 adaptation and diversification is occurring within *Anopheles gambiae* s.s.  
61 (hereafter *An. gambiae*) and *Anopheles coluzzii*, two of the most widespread and  
62 important vectors of malaria within the complex [17-20]. Up to now, shallow  
63 sampling and/or or the use of low-resolution genetic markers limited the ability to  
64 delineate new cryptic subgroups within either species.

65 We genotyped 941 mosquitoes collected from diverse environments in  
66 Cameroon at >8,000 SNPs and find strong evidence for ongoing diversification  
67 within both *An. gambiae* and *An. coluzzii*. In total, the two species harbor seven  
68 cryptic subgroups distributed along a continuum of genomic differentiation. While  
69 *An. gambiae* exhibits relatively high levels of panmixia, we did identify an ecotype  
70 associated with intense suburban agriculture and a second subgroup that  
71 appears partially reproductively isolated but exhibits no obvious  
72 ecological/geographical distinctions. In contrast, *An. coluzzii* is separated into  
73 multiple ecotypes exploiting different regional-scale habitats, including highly  
74 urbanized landscapes. In most cryptic subgroups, selective sweeps contain an  
75 excess of detoxification enzymes and insecticide resistance genes, suggesting  
76 that human activity mediates spatially varying natural selection in both species.  
77 Worryingly, ongoing local adaptation to urban sites with high prevalence of  
78 xenobiotics is both increasing malaria transmission spatially and further  
79 compromising the effectiveness of chemical control tools. Moreover, the  
80 extensive population structure within both species will present a formidable  
81 challenge to novel vector control strategies that rely on population replacement.

82

## 83 RESULTS

84

85 We performed extensive, largely unbiased collections of human-  
86 associated *Anopheles* across four ecological zones in the central African country  
87 of Cameroon (Table S1). To robustly detect any cryptic populations, we  
88 subjected all 941 mosquitoes that were morphologically identified as *An.*  
89 *gambiae* s.l. to population genomic analysis. Individual mosquitoes were  
90 genotyped in parallel at a dense panel of markers using double-digest restriction  
91 associated DNA sequencing (ddRADseq), which enriches for a representative  
92 and reproducible fraction of the genome that can be sequenced on the Illumina  
93 platform [21].

94

### 95 *Identification of An. gambiae* s.l. sibling species

96

97 After aligning ddRADseq reads to the *An. gambiae* reference genome, we  
98 used STACKS to remove loci present in <80% of individuals, leaving 8,476 SNPs  
99 (~1 SNP every 30kb across the genome) for population structure inference [22,  
100 23]. First, we performed principal component analysis (PCA) on genetic diversity  
101 across all 941 individuals (Figure 1A). The top three components explain 28.4%  
102 of the total variance and group individuals into five main clusters. Likewise, a  
103 neighbor-joining (NJ) tree, based on Euclidian distance of allele frequencies,  
104 shows five distinct clades of mosquitoes (Figure 1B). We hypothesized that these  
105 groups at least partially correspond to the four sibling species – *An. gambiae*,  
106 *An. coluzzii*, *An. arabiensis*, and *An. melas* – known to occur in Cameroon. To  
107 confirm, we typed a subset of 288 specimens using validated species ID PCRs  
108 and found that each cluster comprised a single species [24, 25]. In agreement

109 with previous surveys [26, 27], our collections indicate that the brackish water  
110 breeding *An. melas* is limited to coastal regions, while the arid-adapted *An.*  
111 *arabiensis* is restricted to the savannah. In contrast, *An. gambiae* and *An.*  
112 *coluzzii* are distributed across the four eco-geographic zones of Cameroon  
113 (Figure 1D). Lee and colleagues [28] recently reported frequent bouts of  
114 hybridization between *An. gambiae* and *An. coluzzii* in Cameroon. While both the  
115 PCA and NJ trees clearly separate the two species, the PCA does show  
116 intermixing of some rare individuals consistent with semi-permeable species  
117 boundaries.

118 In support of population structuring below the species level, Bayesian  
119 clustering analysis finds that 7 population clusters ( $k$ ) best explain the genetic  
120 variance present in our sample set (Figure S1). Indeed, grouping of samples  
121 within *An. gambiae* and *An. coluzzii* clades suggests that additional subdivision  
122 may exist within each species (Figure 1A, 1B). Ancestry plots made with  
123 fastSTRUCTURE [29] further support inference from the PCA and NJ tree: at  
124 least two subgroups compose *An. coluzzii* and admixture is present within *An.*  
125 *gambiae*, while *An. arabiensis* and *An. melas* are largely panmictic (Figure 1C,  
126 Figure S1).

127

### 128 *Cryptic Population Structure within An. gambiae s.s.*

129 To further resolve the population structure within 357 *An. gambiae*  
130 specimens, we performed population genetic analysis with a set of 9,345 filtered  
131 SNPs. Using a combination of PCA, NJ trees, and ancestry assignment, we

132 consistently identify three distinct subgroups within *An. gambiae* (Figure 2A-C).  
133 The first and largest subgroup (termed *GAM1*) comprises the vast majority of all  
134 *An. gambiae* specimens including individuals collected in all four eco-geographic  
135 regions. A total of 17 individuals make up a second small subgroup (termed  
136 *GAM2*). Interestingly, individuals assigned to this cluster include both larvae and  
137 adults collected in 3 different villages spread across 2 eco-geographic regions. In  
138 the absence of any obvious evidence of niche differentiation between *GAM1* and  
139 *GAM2*, it is unclear what is driving and/or maintaining divergence between the  
140 two sympatric subgroups. Specimens collected from Nkolondom, a suburban  
141 neighborhood of Yaoundé where larval sites associated with small-scale  
142 agricultural irrigation are common [30, 31], form a genetically distinct third  
143 subgroup (termed *Nkolondom*) that appears to be a locally-adapted ecotype.

144

#### 145 *Cryptic Population Structure within An. coluzzii*

146 To examine population structure within 521 *An. coluzzii* specimens, we  
147 utilized 9,822 SNPs that passed stringent filtration. All analyses show a clear split  
148 between individuals from the northern savannah region and the southern three  
149 forested regions of Cameroon (Coastal, Forest, Forest-Savannah) (Figure 3A-C).  
150 In principle, the north-south structuring could be caused solely by differences in  
151 chromosome 2 inversion frequencies, which form a cline from near absence in  
152 the humid south to fixation in the arid north. However, we find SNPs from all five  
153 chromosomal arms robustly and consistently separate northern and southern

154 mosquitoes, suggesting incipient reproductive isolation between the two  
155 populations (Figure S2).

156 Southern populations of *An. coluzzii* were collected from three different  
157 areas: Douala (the largest city of Cameroon), Yaoundé (the second largest city)  
158 and the rural coastal region. PCA, NJ trees, and fastSTRUCTURE show clear  
159 clustering of southern samples by collection site (Figure 3D-F). Mosquitoes from  
160 Douala, situated on the coastal border, contain a mixture of urban and coastal  
161 polymorphisms as illustrated by their intermediate position along PC3 (Figure  
162 3D). Despite considerable geographic segregation, clusters are not fully discrete,  
163 likely owing to substantial migration between the three sites. Taken together, the  
164 data suggest a dynamic and ongoing process of local adaptation within southern  
165 *An. coluzzii*. In contrast, no similar geographic clustering is observed in northern  
166 populations (Figure S1, S3).

167

### 168 *Relationships Between Species and Subgroups*

169 Population genomic analysis identified four different *An. gambiae* s.l.  
170 species present within our samples. Within *An. gambiae* and *An. coluzzii* we  
171 identified seven potential subgroups with apparently varying levels of isolation.  
172 To further explore the relationships between different populations, we built an  
173 unrooted NJ tree using pairwise levels of genomic divergence ( $F_{ST}$ ) between all  
174 species and subgroups (Figure 4, Table S2). As previously observed in a  
175 phylogeny based on whole genome sequencing [16], we find that *An. melas* is  
176 highly divergent from all other species ( $F_{ST} \sim 0.8$ ), while *An. arabiensis* shows



177 intermediate levels of divergence ( $F_{ST} \sim 0.4$ ) from *An. gambiae* and *An. coluzzii*.  
178 As expected, the sister species *An. gambiae* and *An. coluzzii* are more closely  
179 related to each other ( $F_{ST} \sim 0.2$ ) than any other species. When examining  
180 differentiation between subgroups within *An. coluzzii*, we find that the southern  
181 and northern subgroups are highly divergent ( $F_{ST} > 0.1$ ), while differentiation  
182 between local ecotypes within the south is much lower ( $F_{ST} < 0.04$ ). The *An.*  
183 *gambiae* subgroups *GAM1* and *GAM2* are highly diverged ( $F_{ST} \sim 0.1$ ) from each  
184 other suggesting genuine barriers to gene flow despite sympatry, while the  
185 suburban ecotype from Nkolondom shows a low level of divergence from *GAM1*  
186 ( $F_{ST} \sim 0.05$ ), characteristic of ongoing local adaptation. In sum, we find a gradient  
187 of differentiation between species and subgroups ranging from complete (or  
188 nearly complete) reproductive isolation down to the initial stages of divergence  
189 with gene flow.

190  
191 *Using genome scans to identify selective sweeps*

192  
193 To find potential targets of selection within subgroups we performed scans  
194 of nucleotide diversity ( $\theta_w$ ,  $\theta_\pi$ ) and allele frequency spectrum (*Tajima's D*) using  
195 non-overlapping 150-kb windows across the genome. Scans of  $\theta_w$ ,  $\theta_\pi$ , and  
196 *Tajima's D* were conducted by importing aligned, but otherwise unfiltered, reads  
197 directly into ANGSD, which uses genotype likelihoods to calculate summary  
198 statistics [32]. Natural selection can increase the frequency of an adaptive variant  
199 within a population, leading to localized reductions in genetic diversity (and a  
200 skew towards rare polymorphisms) as the haplotype containing the adaptive  
201 variant(s) sweeps towards fixation [33, 34]. Thus, genomic regions harboring

202 targets of recent selection should exhibit extreme reductions in these metrics  
203 relative to genome-wide averages [35].

204 We also performed genome scans using both a relative ( $F_{ST}$ ) and absolute  
205 ( $d_{xy}$ ) measure of divergence calculated with STACKS and ANGSD, respectively  
206 [36]. If positive selection is acting on alternative haplotypes of the same locus in  
207 two populations, values of  $F_{ST}$  and  $d_{xy}$  should increase at the target of selection.  
208 Whereas spatially varying selection that acts on one population, but not the  
209 other, should produce a spike in  $F_{ST}$  between populations and no change in  $d_{xy}$ .  
210 Finally, parallel selection on the same haplotype in two populations should lead  
211 to a decrease in both metrics. For both diversity and divergence scans we used a  
212 maximum of 40 mosquitoes per population, prioritizing individuals with the  
213 highest coverage in populations where sample size exceeded 40.

214

#### 215 *Targets of Selection within An. gambiae subgroups*

216 Our calculations of genome-wide diversity levels (Table S3) within *An.*  
217 *gambiae* subgroups are comparable to previous estimates based on RAD  
218 sequencing of Kenyan *An. gambiae* s.l. populations [37]. As expected, the large  
219 *GAM1* population harbors more genetic diversity than the apparently rare *GAM2*  
220 population or the geographically restricted Nkolondom ecotype (Table S3, Figure  
221 5A-C). *Tajima's D* is consistently negative across the entire genome of all three  
222 subgroups, indicating an excess of low-frequency variants that are likely the  
223 result of recent population expansion (Figure 5A-C) [34]. Indeed, formal

224 demographic models infer relatively recent bouts of population expansion in all  
225 three subgroups (Table S4).

226 Genome scans of each subgroup reveal genomic regions that show  
227 concordant dips in diversity and allele frequency spectrum consistent with recent  
228 positive selection (highlighted in Figure 5 A-C). An apparent selective sweep on  
229 the left arm of chromosome 2 near the centromere is found in all populations.  
230 Notably, the *para* sodium channel gene is embedded within this sweep. The *kdr*  
231 allele of *para* confers knockdown resistance to pyrethroids and selective sweeps  
232 in the same genomic location have been previously identified in many *An.*  
233 *gambiae* s.l. populations [38-42].

234 Other sweeps are population-specific. For example, a major sweep unique  
235 to the Nkolondom population is found on chromosome 2L from ~33-35 Mb.  
236 Nkolondom is suburban region of Yaoundé where larvae can be readily collected  
237 from irrigated garden plots that likely contain elevated levels of pesticides  
238 directed at agricultural pests [30, 31]. Intriguingly, the region contains six  
239 epidermal growth factor (*EGF*) genes, which could facilitate larval development of  
240 this subgroup in pesticide-laced agricultural water. It should be noted that due to  
241 the reduced representation sequencing approach we used, our analysis is  
242 necessarily conservative, highlighting only clear instances of positive selection,  
243 which are likely both recent and strong [10]. Additional smaller sweeps outside  
244 our power of detection are likely prevalent in all subgroups.

245 We next performed divergence based genome scans. At the putative *kdr*  
246 sweep, we observe contrasting patterns in local values of  $d_{xy}$  and  $F_{ST}$  (Figure 5D-

247 E). In both the GAM1-GAM2 and GAM1-Nkolondom comparisons,  $d_{xy}$  dips at the  
248 *kdr* sweep, while local values of  $F_{ST}$  actually increase. While not definitive, the  
249 dramatic drop in  $d_{xy}$  suggests that the same resistant haplotype is sweeping  
250 through each population. Localized increases in  $F_{ST}$  could owe to differences in  
251 *kdr* allele frequencies between populations; despite parallel selection, the sweep  
252 may be closer to fixation in certain populations relative to others, perhaps due to  
253 differences in selection intensity. At the Nkolondom specific 2L *EGF* sweep, we  
254 observe an increase in  $F_{ST}$  between *GAM1-Nkolondom* and no clear change in  
255  $d_{xy}$ , indicative of ongoing local adaptation in Nkolondom.

256

#### 257 *Targets of Selection within An. coluzzii subpopulations*

258

259 As above, we first used diversity metrics to scan for targets of selection in  
260 the four subgroups of *An. coluzzii*. Overall, genetic diversity is higher in the  
261 northern savannah population than either of three southern populations, which all  
262 exhibit similar levels of diversity (Table S3). Just as in *An. gambiae*, all  
263 subgroups have consistently negative *Tajima's D* values confirming demographic  
264 models of population expansion (Table S4). Examination of genome-wide plots  
265 reveals that all subgroups exhibit dips in diversity and *Tajima's D* at the *kdr* locus  
266 (Figure 6A-D). A large sweep at ~25 Mb on 2L centered on the resistance to  
267 dieldrin (*rdl*) locus is clearly present in all southern groups. In the northern  
268 savannah population, a pronounced dip in diversity occurs at *rdl*, but *Tajima's D*  
269 stays constant. While we can confidently infer that a resistant *rdl* allele has  
270 recently swept through all southern populations of *An. coluzzii*, evidence for a

271 sweep in the northern population is inconclusive. Regional and population-  
272 specific sweeps are also evident including a sweep on 3R is nearly exclusive to  
273 mosquitoes collected in the urban areas of Yaoundé and Douala. A sharp,  
274 dramatic drop in both diversity and Tajima's  $D$  occurs on 3R from ~28.5-29.0 Mb  
275 with the decline being more dramatic in Yaoundé than Douala. Geographical  
276 limitation of the sweep to urban mosquitoes strongly suggests it may contain  
277 variant(s) that confer adaptation to extreme levels of anthropogenic disturbance.  
278 Compellingly, the selective sweep contains a cluster of both Glutathione S-  
279 transferase (*GSTE1-GSTE7*) and cytochrome P450 (*CYP4C27*, *CYP4C35*,  
280 *CYP4C36*) genes. Both gene families can confer metabolic resistance to  
281 insecticides and pollutants in mosquitoes [43-45]. In particular, *GSTE5* and  
282 *GSTE6* are intriguing candidate targets of selection as each is up-regulated in  
283 highly insecticide resistant *An. arabiensis* populations that recently colonized  
284 urban areas of Bobo-Dioulasso, Burkina Faso [46, 47].

285         Genome scans of both relative and absolute divergence between  
286 populations reveal intriguing patterns at sites of putative selective sweeps. The  
287 *kdr* locus exhibits minimal divergence in all pairwise comparisons, suggesting  
288 that the same resistance haplotype is under selection in each population (Figure  
289 6E-H). The region surrounding the *rdl* gene shows low  $F_{ST}$  and a pronounced dip  
290 in  $d_{xy}$  between all southern populations, confirming that the same haplotype is  
291 sweeping through these three populations. Differentiation between southern and  
292 northern populations at *rdl* is obscured by the high divergence between  
293 alternative arrangements of the 2La inversion. Finally, the urban-centric

294 GSTE/CYP450 sweep on 3R shows a peak in  $F_{ST}$  between Yaoundé and Coastal  
295 mosquitoes and minimal change in  $d_{xy}$  – a pattern consistent with local  
296 adaptation. Comparisons between Douala and Coastal populations show a more  
297 moderate increase in  $F_{ST}$ , presumably due to high rates of mosquito migration  
298 between these nearby sites. Finally, when comparing mosquitoes from the two  
299 urban areas (Douala and Yaoundé), we observe only a slight bump in  $F_{ST}$  and a  
300 dramatic dip in  $d_{xy}$  indicative of an ongoing, shared selective sweep.

301 To further explore the 3R GSTE/CYP450 sweep, we reconstructed  
302 haplotypes for all 240 *An. coluzzii* southern chromosomes across the 28 SNPs  
303 found within the sweep. In the Yaoundé population, a single haplotype is present  
304 on 44 out of 80 (55%) chromosomes (all grey SNPs), while an additional 11  
305 haplotypes are within one mutational step of this common haplotype (Figure 7A).  
306 In Douala, the same haplotype is the most common, but present at a lower  
307 frequency (31%) than in Yaoundé (Figure 7B). Strikingly, this haplotype is found  
308 on only 6/80 (7.5%) coastal chromosomes (Figure 7C). The overall low  
309 nucleotide variation and high frequency of a single haplotype in Yaoundé is  
310 consistent with positive selection acting on a de novo variant(s) to generate the  
311 3R GSTE/CYP450 sweep. Less intense selection pressure in Douala, and  
312 particularly the Coast, would explain the markedly higher haplotype diversity in  
313 these two populations relative to Yaoundé. It is also possible that Douala  
314 mosquitoes experience similar selection pressures to Yaoundé mosquitoes, but  
315 frequent migrant haplotypes from the nearby rural Coast populations decrease  
316 the efficiency of local adaptation. Importantly, multiple population genomic

317 analyses of the same 28 SNPs (Figure 7D-F) mirror results of the haplotype  
318 analysis, confirming that haplotype inference did not bias the results. In sum, we  
319 hypothesize that divergence in xenobiotic levels between urban and rural larval  
320 habitats is the main ecological force driving spatially variable selection at this  
321 locus.  
322

323 DISCUSSION

324

325           Reduced representation sequencing of 941 *An. gambiae* s.l. collected in  
326 or near human settlements facilitated rapid identification of known sibling species  
327 and revealed multiple instances of novel cryptic diversification within *An.*  
328 *gambiae* and *An. coluzzii*. Genome scans in subgroups highlighted numerous  
329 selective sweeps centered on detoxification enzymes suggesting that xenobiotic  
330 exposure, particularly in urban and suburban areas, is driving local adaptation  
331 within both species. More generally, our study highlights the utility of reduced  
332 representation sequencing as a ‘discovery tool’ for finding hidden population  
333 structure within species. Further, such dense genotyping data also permits  
334 localization of recent selective sweeps, providing insight into the ecological  
335 forces driving diversification.

336 *Anthropogenic Mediated Selection*

337           Human activity has altered the evolutionary trajectory of diverse taxa. In  
338 insects, spatially varying intensity of insecticide application can drive divergence  
339 between populations, potentially leading to reproductive isolation. While a  
340 plausible scenario, scant empirical evidence supports the hypothesis [48].  
341 Previous studies have documented dramatic reductions in the population size of  
342 *An. gambiae* s.l. after introduction of long lasting insecticide treated nets (LLINs),  
343 but did not determine the influence of exposure on population structuring [49, 50].  
344 Among Cameroonian populations of both *An. gambiae* and *An. coluzzii*, we find a  
345 pervasive signature of selection at the *para* sodium channel gene. We infer that  
346 this sweep confers globally beneficial resistance to LLINs, which are ubiquitous



347 in Cameroon and treated with pyrethroids that target *para* [51]. In contrast,  
348 selective sweeps centered on other insecticide resistance genes are restricted to  
349 specific geographic locations/populations. For example, a sweep at the *rdl* locus  
350 is limited to southern populations of *An. coluzzii*. Initial selection for dieldrin  
351 resistance likely occurred during massive indoor residual spraying campaigns  
352 conducted by the WHO in southern Cameroon during the 1950s. Indeed, the  
353 spraying was so intense that it temporarily eliminated *An. gambiae* s.l. from  
354 Yaoundé (and likely other locations in the forest region) [52]. However, due to  
355 high human toxicity, dieldrin has been banned for use in mosquito control since  
356 the mid-1970s. In the absence of insecticide exposure, resistant *rdl* mosquitoes  
357 are significantly less fit than wild type mosquitoes [53-55], making the continued  
358 persistence of resistant alleles in southern *An. coluzzii* populations puzzling. One  
359 plausible explanation is that other cyclodienes targeting *rdl*, such as fipronil and  
360 lindane, are still commonly used in agriculture and may frequently runoff into *An.*  
361 *coluzzii* larval habitats, imposing strong selection for resistant mosquitoes. A  
362 similar phenomenon was recently proposed to explain the maintenance of  
363 resistance *rdl* alleles in both *Culex* and *Aedes* mosquitoes [56].

364 Mosquitoes inhabiting Cameroon's two major cities, Yaoundé and Douala,  
365 provide a clearer example of how xenobiotic exposure can directly influence  
366 population structure. Both cities have seen exponential human population growth  
367 over the past 50 years, creating a high concentration of hosts for anthropophilic  
368 mosquitoes. Despite elevated levels of organic pollutants and insecticides in  
369 urban relative to rural larval sites, surveys show substantial year-round

370 populations of *An. gambiae* and *An. coluzzii* in both cities [57-59]. Bioassays of  
371 insecticide resistance demonstrate that urban mosquitoes have significantly  
372 higher levels of resistance to multiple insecticides compared to rural mosquitoes  
373 [30, 31, 57, 60, 61]. In support of human mediated local adaptation, we find a  
374 selective sweep in urban *An. coluzzii* mosquitoes centered on a cluster of  
375 GSTE/CYP450 detoxification genes. While the specific ecological driver of the  
376 selective sweep is unknown, GSTE and P450 enzymes detoxify both organic  
377 pollutants and insecticides [62-64]. Indeed, the synergistic effects of the two  
378 types of xenobiotics could be exerting intense selection pressure for pleiotropic  
379 resistance in urban mosquitoes [44, 45, 65]. Regardless of the underlying targets  
380 of selection, it is clear that mosquitoes inhabiting highly disturbed urban and  
381 suburban landscapes are genetically differentiated from rural populations.  
382 Further analysis of specific sweeps using a combination of whole genome  
383 resequencing and emerging functional genetics approaches (e.g. CRISPR/Cas9)  
384 should help resolve the specific targets of local adaptation in urban mosquitoes,  
385 while also shedding light on the evolutionary history of the enigmatic subgroup  
386 *GAM2*.

### 387 *Impacts on Vector Control*

388         Just five decades ago, there was not a single city in Sub-Saharan African  
389 with a population over 1 million; today there are more than 40. Population shifts  
390 to urban areas will only continue to increase with the United Nations estimating  
391 that 60% of Africans will live in large cities by 2050 [66]. When urbanization  
392 commenced, it was widely assumed that malaria transmission would be minimal

393 because rural *Anopheles* vectors would not be able to complete development in  
394 the polluted larval habitats present in cities [67]. However, increasingly common  
395 reports of endemic malaria transmission in urban areas across Sub-Saharan  
396 Africa unequivocally demonstrate that anophelines are exploiting the urban niche  
397 [68-70]. Specifically, our study shows that *An. gambiae* s.l. from the urban and  
398 suburban centers of southern Cameroon form genetically distinct subgroups  
399 relative to rural populations. Local adaptation to urban environments is  
400 accompanied by strong selective sweeps centered on putative xenobiotic  
401 resistance genes, which are likely driven by a combination of exposure to organic  
402 pollutants and insecticides in larval habitats. The rapid adaptation of *Anopheles*  
403 to the urban landscape poses a growing health risk to Africans as levels of  
404 resistance in these populations negate the effectiveness of almost all commonly  
405 used insecticides. Moreover, repeated instances of beneficial alleles  
406 introgressing between *An. gambiae* s.l. species make the emergence of highly  
407 resistant subgroups even more troubling [14, 16, 41, 42, 71]. In essence, urban  
408 populations can serve as a reservoir for resistance alleles, which have the  
409 potential to rapidly move between species/populations as needed. Clearly,  
410 sustainable malaria vector control, urban or otherwise, requires not only more  
411 judicious use of insecticides, but also novel strategies not reliant on chemicals.  
412 Towards this goal, various vector control methods that aim to replace or  
413 suppress wild mosquito populations using genetic drive are currently under  
414 development (e.g. [72]). While promising, the complexities of ongoing cryptic

415 diversification within African *Anopheles* must be explicitly planned for prior to the

416 release of transgenic mosquitoes.

417

418 **MATERIALS AND METHODS**

419

420 *Mosquito collections*

421

422 In 2013, we collected *Anopheles* from 30 locations spread across the four

423 major ecogeographic regions of Cameroon (Table S1). Indoor resting adult

424 mosquitoes were collected by pyrethrum spray catch, while host-seeking adults

425 were obtained via indoor/outdoor human-baited landing catch. Larvae were

426 collected using standard dipping procedures [73]. All researchers were provided

427 with malaria chemoprophylaxis throughout the collection period following [74].

428 Individual mosquitoes belonging to the *An. gambiae* s.l. complex were identified

429 by morphology [75].

430

431 *ddRADseq Library Construction*

432 Genomic DNA was extracted from adults using the ZR-96 Quick-gDNA kit

433 (Zymo Research) and from larvae using the DNeasy Extraction kit (Qiagen). A

434 subset of individuals were assigned to sibling species using PCR-RFLP assays

435 that type fixed SNP differences in the rDNA [76]. Preparation of ddRAD libraries

436 largely followed [77]. Briefly,  $\sim 1/3^{\text{rd}}$  of the DNA extracted from an individual

437 mosquito (10ul) was digested with *MluC1* and *NlaIII* (New England Biolabs).

438 Barcoded adapters (1 of 48) were ligated to overhangs and 400 bp fragments

439 were selected using 1.5% gels on a BluePippin (Sage Science). One of six

440 indices was added during PCR amplification. Each library contained 288

441 individuals and was subjected to single end, 100 bp sequencing across one or

442 two flow cells lanes run on an Illumina HiSeq2500. A detailed library preparation  
443 protocol is available at [mosquitogenomics.org/protocols](http://mosquitogenomics.org/protocols).

444 Raw sequence reads were demultiplexed and quality filtered using the  
445 STACKS v 1.29 `process_radtags` pipeline [22, 23]. After removal of reads with  
446 ambiguous barcodes, incorrect restriction sites, and low sequencing quality  
447 (mean Phred < 33), GSNAP was used to align reads to the *An. gambiae* PEST  
448 reference genome (AgamP4.2) allowing up to five mismatches per read. After  
449 discarding reads that perfectly aligned to more than one genomic position, we  
450 used STACKS to identify unique RAD tags and construct consensus assemblies  
451 for each. Individual SNP genotypes were called using default setting in the  
452 maximum-likelihood statistical model implemented in the STACKS genotypes  
453 pipeline.

454

#### 455 *Population Genomic Analysis*

456 Population genetic structure was assessed using the SNP dataset output  
457 by the *populations* program of STACKS. We used PLINK v 1.19 to retrieve  
458 subsets of genome-wide SNPs as needed [78]. PCA, neighbor-joining tree  
459 analyses, and Bayesian information criterion (BIC) were implemented using the  
460 packages *adegenet* and *ape* in R [79, 80]. Ancestry analyses were conducted in  
461 fastSTRUCTURE v 1.0 [29] using the logistic method. The `choosek.py` script was  
462 used to find the appropriate number of populations (k); in cases where a range of  
463 k was suggested, the BIC-inferred number of clusters was chosen [81]. Ancestry  
464 assignment of individual mosquitoes was then visualized with DISTRUCT v 1.1

465 [82]. We input pairwise  $F_{ST}$  values into the program Fitch from the Phylip [83]  
466 suite to create the population-level NJ tree.

467

#### 468 *Genome Scans for Selection*

469 We used ANGSD v 0.612 [32] to calculate nucleotide diversity ( $\theta_w$  and  $\theta_\pi$ )  
470 and Tajima's  $D$  in 150-kb non-overlapping windows. Unlike most genotyping  
471 algorithms, ANGSD does not perform hard SNP calls, instead taking genotyping  
472 uncertainty into account when calculating summary statistics. Similarly, absolute  
473 divergence ( $d_{xy}$ ) was calculated using *ngsTools* [84] based on genotype  
474 likelihoods generated by ANGSD. Kernel smoothed values for 150-kb windows  
475 for all four metrics ( $\theta_w$ ,  $\theta_\pi$ ,  $D$ ,  $d_{xy}$ ) were obtained with the R package *KernSmooth*.  
476  $F_{ST}$  (based on AMOVA) was calculated with the *populations* program in STACKS  
477 using only loci present in 80% of individuals. A Kernel smoothing procedure  
478 implemented in STACKS was used to obtain  $F_{ST}$  values across 150-kb windows.  
479 Selective sweeps were identified by locating regions where Tajima's  $D$  was in the  
480 top percentile of empirical values in at least one population. Regions with low  
481 Tajima's  $D$ , but unusually high or low read depth (Figure S4) were deemed  
482 unreliable due to the likelihood of repeats and local misassembly. We used a  
483 subset of 1,000 randomly chosen SNPs to calculate average pairwise  $F_{ST}$   
484 between populations in GENODIVE using up to 40 individuals – prioritized by  
485 coverage – per population [85]. To determine if selective sweeps were enriched  
486 for specific functional annotation classes, we used the program DAVID 6.7 with

487 default settings [86]. Haplotypes across the GSTE/CYP450 sweep were  
488 reconstructed by PHASE v 2.1.1 using the default recombination model (87).  
489



490 ACKNOWLEDGEMENTS

491 This work was supported by the University of California Riverside and National  
492 Institutes of Health (1R01AI113248, 1R21AI115271 to BJW). We thank Elysée  
493 Nchoutpouem and Raymond Fokom for assistance collecting mosquitoes and  
494 Sina Hananian for assisting in DNA extraction.

495

496

497 AUTHOR CONTRIBUTIONS

498

499 Conceived and designed the experiments: CK BJW. Performed the experiments:

500 CK BJW SG. Analyzed the data: CK CF BJW. Wrote the paper: CK CF BJW.

501

502 REFERENCES  
503

- 504 1. Nosil, P., Vines, T.H., and Funk, D.J. (2005). Reproductive isolation  
505 caused by natural selection against immigrants from divergent habitats.  
506 *Evolution* 59, 705-719.
- 507 2. Hereford, J. (2009). A quantitative survey of local adaptation and fitness  
508 trade-offs. *The American Naturalist* 173, 579-588.
- 509 3. Gaston, K.J. (2010). *Urban ecology*, (Cambridge University Press).
- 510 4. Pelz, H.-J., Rost, S., Hünnerberg, M., Fregin, A., Heiberg, A.-C., Baert, K.,  
511 MacNicoll, A.D., Prescott, C.V., Walker, A.-S., and Oldenburg, J. (2005).  
512 The genetic basis of resistance to anticoagulants in rodents. *Genetics*  
513 170, 1839-1847.
- 514 5. Song, Y., Endepols, S., Klemann, N., Richter, D., Matuschka, F.-R., Shih,  
515 C.-H., Nachman, M.W., and Kohn, M.H. (2011). Adaptive introgression of  
516 anticoagulant rodent poison resistance by hybridization between old world  
517 mice. *Current Biology* 21, 1296-1301.
- 518 6. Davies, T.G.E., Field, L.M., and Williamson, M.S. (2012). The re-  
519 emergence of the bed bug as a nuisance pest: implications of resistance  
520 to the pyrethroid insecticides. *Medical and Veterinary Entomology* 26, 241-  
521 254.
- 522 7. Kawecki, T.J., and Ebert, D. (2004). Conceptual issues in local adaptation.  
523 *Ecology Letters* 7, 1225-1241.

- 524 8. Berdahl, A., Torney, C.J., Schertzer, E., and Levin, S.A. (2015). On the  
525 evolutionary interplay between dispersal and local adaptation in  
526 heterogeneous environments. *Evolution*.
- 527 9. Le Corre, V., and Kremer, A. (2012). The genetic differentiation at  
528 quantitative trait loci under local adaptation. *Molecular Ecology* 21, 1548-  
529 1566.
- 530 10. Tiffin, P., and Ross-Ibarra, J. (2014). Advances and limits of using  
531 population genetics to understand local adaptation. *Trends in ecology &*  
532 *evolution* 29, 673-680.
- 533 11. Feder, J.L., Flaxman, S.M., Egan, S.P., Comeault, A.A., and Nosil, P.  
534 (2013). Geographic mode of speciation and genomic divergence. *Annual*  
535 *Review of Ecology, Evolution, and Systematics* 44, 73-97.
- 536 12. White, B.J., Collins, F.H., and Besansky, N.J. (2011). Evolution of  
537 *Anopheles gambiae* in Relation to Humans and Malaria. *Annu Rev Ecol*  
538 *Evol S* 42, 111-132.
- 539 13. Coetzee, M., Hunt, R.H., Wilkerson, R., Della Torre, A., Coulibaly, M.B.,  
540 and Besansky, N.J. (2013). *Anopheles coluzzii* and *Anopheles amharicus*,  
541 new members of the *Anopheles gambiae* complex. *Zootaxa* 3619, 246-  
542 274.
- 543 14. Crawford, J., Riehle, M.M., Guelbeogo, W.M., Gneme, A., Sagnon, N.f.,  
544 Vernick, K.D., Nielsen, R., and Lazzaro, B.P. (2014). Reticulate speciation  
545 and adaptive introgression in the *Anopheles gambiae* species complex.  
546 bioRxiv, 009837.

- 547 15. Holt, R.A., Subramanian, G.M., Halpern, A., Sutton, G.G., Charlab, R.,  
548 Nusskern, D.R., Wincker, P., Clark, A.G., Ribeiro, J.M., Wides, R., et al.  
549 (2002). The genome sequence of the malaria mosquito *Anopheles*  
550 *gambiae*. *Science* 298, 129-149.
- 551 16. Fontaine, M.C., Pease, J.B., Steele, A., Waterhouse, R.M., Neafsey, D.E.,  
552 Sharakhov, I., Jiang, X., Hall, A.B., Catteruccia, F., Kakani, E., et al.  
553 (2014). Extensive introgression in a malaria vector species complex  
554 revealed by phylogenomics. *Science*.
- 555 17. Slotman, M.A., Tripet, F., Cornel, A.J., Meneses, C.R., Lee, Y., Reimer,  
556 L.J., Thiemann, T.C., Fondjo, E., Fofana, A., Traore, S.F., et al. (2007).  
557 Evidence for subdivision within the M molecular form of *Anopheles*  
558 *gambiae*. *Mol Ecol* 16, 639-649.
- 559 18. Wang-Sattler, R., Blandin, S., Ning, Y., Blass, C., Dolo, G., Toure, Y.T.,  
560 della Torre, A., Lanzaro, G.C., Steinmetz, L.M., Kafatos, F.C., et al.  
561 (2007). Mosaic Genome Architecture of the *Anopheles gambiae* Species  
562 Complex. *PLoS One* 2, -.
- 563 19. Lee, Y., Marsden, C.D., Norris, L.C., Collier, T.C., Main, B.J., Fofana, A.,  
564 Cornel, A.J., and Lanzaro, G.C. (2013). Spatiotemporal dynamics of gene  
565 flow and hybrid fitness between the M and S forms of the malaria  
566 mosquito, *Anopheles gambiae*. *Proceedings of the National Academy of*  
567 *Sciences* 110, 19854-19859.
- 568 20. Caputo, B., Nwakanma, D., Caputo, F., Jawara, M., Oriero, E.,  
569 Hamid-Adiamoh, M., Dia, I., Konate, L., Petrarca, V., and Pinto, J. (2014).

- 570 Prominent intraspecific genetic divergence within *Anopheles gambiae*  
571 sibling species triggered by habitat discontinuities across a riverine  
572 landscape. *Molecular Ecology* 23, 4574-4589.
- 573 21. Peterson, B.K., Weber, J.N., Kay, E.H., Fisher, H.S., and Hoekstra, H.E.  
574 (2012). Double digest RADseq: an inexpensive method for de novo SNP  
575 discovery and genotyping in model and non-model species. *PLoS One* 7,  
576 e37135.
- 577 22. Catchen, J., Hohenlohe, P.A., Bassham, S., Amores, A., and Cresko,  
578 W.A. (2013). Stacks: an analysis tool set for population genomics.  
579 *Molecular Ecology* 22, 3124-3140.
- 580 23. Catchen, J.M., Amores, A., Hohenlohe, P., Cresko, W., and Postlethwait,  
581 J.H. (2011). Stacks: building and genotyping loci de novo from short-read  
582 sequences. *G3: Genes, Genomes, Genetics* 1, 171-182.
- 583 24. Scott, J.A., Brogdon, W.G., and Collins, F.H. (1993). Identification of  
584 single specimens of the *Anopheles gambiae* complex by the polymerase  
585 chain reaction. *Am J Trop Med Hyg* 49, 520-529.
- 586 25. Santolamazza, F., Della Torre, A., and Caccone, A. (2004). Short report: A  
587 new polymerase chain reaction-restriction fragment length polymorphism  
588 method to identify *Anopheles arabiensis* from *An. gambiae* and its two  
589 molecular forms from degraded DNA templates or museum samples. *Am*  
590 *J Trop Med Hyg* 70, 604-606.
- 591 26. Wondji, C., Frederic, S., Petrarca, V., Etang, J., Santolamazza, F., Della  
592 Torre, A., and Fontenille, D. (2005). Species and populations of the

- 593        *Anopheles gambiae* complex in Cameroon with special emphasis on  
594        chromosomal and molecular forms of *Anopheles gambiae* s.s. J Med  
595        Entomol 42, 998-1005.
- 596    27.    Simard, F., Ayala, D., Kamdem, G.C., Etouna, J., Ose, K., Fotsing, J.-M.,  
597        Fontenille, D., Besansky, N.J., and Costantini, C. (2009). Ecological niche  
598        partitioning between the M and S molecular forms of *Anopheles gambiae*  
599        in Cameroon: the ecological side of speciation. BMC Ecology 9, 17.
- 600    28.    Lee, Y., Marsden, C.D., Norris, L.C., Collier, T.C., Main, B.J., Fofana, A.,  
601        Cornel, A.J., and Lanzaro, G.C. (2013). Spatiotemporal dynamics of gene  
602        flow and hybrid fitness between the M and S forms of the malaria  
603        mosquito, *Anopheles gambiae*. Proceedings of the National Academy of  
604        Sciences of the United States of America 110, 19854-19859.
- 605    29.    Raj, A., Stephens, M., and Pritchard, J.K. (2014). fastSTRUCTURE:  
606        variational inference of population structure in large SNP data sets.  
607        Genetics 197, 573-589.
- 608    30.    Nwane, P., Etang, J., Chouaibou, M., Toto, J.C., Koffi, A., Mimpfoundi, R.,  
609        and Simard, F. (2013). Multiple insecticide resistance mechanisms in  
610        *Anopheles gambiae* s.l populations from Cameroon, Central Africa. Parasit  
611        Vectors 6, 41.
- 612    31.    Tene, B.F., Poupardin, R., Costantini, C., Awono-Ambene, P., Wondji,  
613        C.S., Ranson, H., and Antonio-Nkondjio, C. (2013). Resistance to DDT in  
614        an urban setting: common mechanisms implicated in both M and S forms

- 615 of *Anopheles gambiae* in the city of Yaoundé Cameroon. *PLoS One* 8,  
616 e61408.
- 617 32. Korneliussen, T.S., Albrechtsen, A., and Nielsen, R. (2014). ANGSD:  
618 analysis of next generation sequencing data. *BMC bioinformatics* 15, 356.
- 619 33. Maynard Smith, J., and Haigh, j. (1974). The hitch-hiking effect of a  
620 favorable gene. *Genetical research* 23, 22-35.
- 621 34. Tajima, F. (1989). Statistical method for testing the neutral mutation  
622 hypothesis by DNA polymorphism. *Genetics* 123, 585-595.
- 623 35. Storz, J.F. (2005). Using genome scans of DNA polymorphism to infer  
624 adaptive population divergence. *Mol Ecol* 14, 671-688.
- 625 36. Cruickshank, T.E., and Hahn, M.W. (2014). Reanalysis suggests that  
626 genomic islands of speciation are due to reduced diversity, not reduced  
627 gene flow. *Molecular Ecology* 23, 3133-3157.
- 628 37. O'Loughlin, S.M., Magesa, S., Mbogo, C., Mosha, F., Midega, J., Lomas,  
629 S., and Burt, A. (2014). Genomic analyses of three malaria vectors reveals  
630 extensive shared polymorphism but contrasting population histories.  
631 *Molecular Biology and Evolution* 31, 889-902.
- 632 38. Donnelly, M.J., Corbel, V., Weetman, D., Wilding, C.S., Williamson, M.S.,  
633 and Black, W.C. (2009). Does *kdr* genotype predict insecticide-resistance  
634 phenotype in mosquitoes? *Trends in Parasitology* 25, 213-219.
- 635 39. Lynd, A., Weetman, D., Barbosa, S., Yawson, A.E., Mitchell, S., Pinto, J.,  
636 Hastings, I., and Donnelly, M.J. (2010). Field, genetic, and modeling  
637 approaches show strong positive selection acting upon an insecticide



- 638 resistance mutation in *Anopheles gambiae* ss. *Molecular Biology and*  
639 *Evolution* 27, 1117-1125.
- 640 40. Jones, C.M., Liyanapathirana, M., Agossa, F.R., Weetman, D., Ranson,  
641 H., Donnelly, M.J., and Wilding, C.S. (2012). Footprints of positive  
642 selection associated with a mutation (N1575Y) in the voltage-gated  
643 sodium channel of *Anopheles gambiae*. *Proceedings of the National*  
644 *Academy of Sciences* 109, 6614-6619.
- 645 41. Clarkson, C.S., Weetman, D., Essandoh, J., Yawson, A.E., Maslen, G.,  
646 Manske, M., Field, S.G., Webster, M., Antão, T., and MacInnis, B. (2014).  
647 Adaptive introgression between *Anopheles* sibling species eliminates a  
648 major genomic island but not reproductive isolation. *Nature*  
649 *communications* 5.
- 650 42. Norris, L.C., Main, B.J., Lee, Y., Collier, T.C., Fofana, A., Cornel, A.J., and  
651 Lanzaro, G.C. (2015). Adaptive introgression in an African malaria  
652 mosquito coincident with the increased usage of insecticide-treated bed  
653 nets. *Proceedings of the National Academy of Sciences* 112, 815-820.
- 654 43. Enayati, A.A., Ranson, H., and Hemingway, J. (2005). Insect glutathione  
655 transferases and insecticide resistance. *Insect Molecular Biology* 14, 3-8.
- 656 44. Nkya, T.E., Akhouayri, I., Kisinza, W., and David, J.-P. (2013). Impact of  
657 environment on mosquito response to pyrethroid insecticides: facts,  
658 evidences and prospects. *Insect Biochemistry and Molecular Biology* 43,  
659 407-416.

- 660 45. David, J.-P., Ismail, H.M., Chandor-Proust, A., and Paine, M.J.I. (2013).  
661 Role of cytochrome P450s in insecticide resistance: impact on the control  
662 of mosquito-borne diseases and use of insecticides on Earth.  
663 Philosophical Transactions of the Royal Society of London B: Biological  
664 Sciences 368, 20120429.
- 665 46. Dabiré, R.K., Namountougou, M., Sawadogo, S.P., Yaro, L.B., Toé, H.K.,  
666 Ouari, A., Gouagna, L.-C., Simard, F., Chandre, F., and Baldet, T. (2012).  
667 Population dynamics of *Anopheles gambiae* sl in Bobo-Dioulasso city:  
668 bionomics, infection rate and susceptibility to insecticides. Parasit Vectors  
669 5, 127.
- 670 47. Jones, C.M., Toé, H.K., Sanou, A., Namountougou, M., Hughes, A.,  
671 Diabaté, A., Dabiré, R., Simard, F., and Ranson, H. (2012). Additional  
672 selection for insecticide resistance in urban malaria vectors: DDT  
673 resistance in *Anopheles arabiensis* from Bobo-Dioulasso, Burkina Faso.  
674 PLoS One 7, e45995.
- 675 48. Chen, H., Wang, H., and Siegfried, B.D. (2012). Genetic differentiation of  
676 western corn rootworm populations (Coleoptera: Chrysomelidae) relative  
677 to insecticide resistance. Ann Entomol Soc Am 105, 232-240.
- 678 49. Athrey, G., Hodges, T.K., Reddy, M.R., Overgaard, H.J., Matias, A., Ridl,  
679 F.C., Kleinschmidt, I., Caccone, A., and Slotman, M.A. (2012). The  
680 effective population size of malaria mosquitoes: large impact of vector  
681 control. PLoS genetics 8, e1003097.

- 682 50. Bayoh, M.N., Mathias, D.K., Odiere, M.R., Mutuku, F.M., Kamau, L.,  
683 Gimnig, J.E., Vulule, J.M., Hawley, W.A., Hamel, M.J., and Walker, E.D.  
684 (2010). *Anopheles gambiae*: historical population decline associated with  
685 regional distribution of insecticide-treated bed nets in western Nyanza  
686 Province, Kenya.
- 687 51. Bowen, H.L. (2013). Impact of a mass media campaign on bed net use in  
688 Cameroon. *Malar J* 12, 10.1186.
- 689 52. Livadas, G., Mouchet, J., Gariou, J., and Chastang, R. (1958). Can one  
690 foresee the eradication of malaria in wooded areas of South Cameroun.  
691 *Rivista di Malariologia* 37, 229.
- 692 53. Rowland, M. (1991). Activity and mating competitiveness of gamma  
693 HCH/dieldrin resistant and susceptible male and virgin female *Anopheles*  
694 *gambiae* and *An. stephensi* mosquitoes, with assessment of an  
695 insecticide-rotation strategy. *Medical and Veterinary Entomology* 5, 207.
- 696 54. Rowland, M. (1991). Behaviour and fitness of gamma HCH/dieldrin  
697 resistant and susceptible female *Anopheles gambiae* and *An. stephensi*  
698 mosquitoes in the absence of insecticide. *Medical and Veterinary*  
699 *Entomology* 5, 193.
- 700 55. Platt, N., Kwiatkowska, R., Irving, H., Diabaté, A., Dabire, R., and Wondji,  
701 C. (2015). Target-site resistance mutations (*kdr* and *RDL*), but not  
702 metabolic resistance, negatively impact male mating competitiveness in the  
703 malaria vector *Anopheles gambiae*. *Heredity*.

- 704 56. Tantely, M.L., Tortosa, P., Alout, H., Berticat, C., Berthomieu, A., Rutee,  
705 A., Dehecq, J.-S., Makoundou, P., Labbé, P., and Pasteur, N. (2010).  
706 Insecticide resistance in *Culex pipiens quinquefasciatus* and *Aedes*  
707 *albopictus* mosquitoes from La Reunion Island. *Insect Biochemistry and*  
708 *Molecular Biology* 40, 317-324.
- 709 57. Antonio-Nkondjio, C., Fossog, B.T., Ndo, C., Djantio, B.M., Togouet, S.Z.,  
710 Awono-Ambene, P., Costantini, C., Wondji, C.S., and Ranson, H. (2011).  
711 *Anopheles gambiae* distribution and insecticide resistance in the cities of  
712 Douala and Yaounde(Cameroon): influence of urban agriculture and  
713 pollution. *Malaria Journal* 10, 154-154.
- 714 58. Kamdem, C., Fossog, B.T., Simard, F., Etouna, J., Ndo, C., Kengne, P.,  
715 Boussès, P., Etoa, F.-X., Awono-Ambene, P., and Fontenille, D. (2012).  
716 Anthropogenic habitat disturbance and ecological divergence between  
717 incipient species of the malaria mosquito *Anopheles gambiae*. *PLoS One*  
718 7, e39453.
- 719 59. Antonio-Nkondjio, C., Youmsi-Goupeyou, M., Kopya, E., Tene-Fossog, B.,  
720 Njiokou, F., Costantini, C., and Awono-Ambene, P. (2014). Exposure to  
721 disinfectants (soap or hydrogen peroxide) increases tolerance to  
722 permethrin in *Anopheles gambiae* populations from the city of Yaoundé,  
723 Cameroon. *Malaria Journal* 13, 296.
- 724 60. Nwane, P., Etang, J., Chouaibou, M., Toto, J.C., Kerah-Hinzoumbé, C.,  
725 Mimpfoundi, R., Awono-Ambene, H.P., and Simard, F. (2009). Trends in  
726 DDT and pyrethroid resistance in *Anopheles gambiae* ss populations from

- 727 urban and agro-industrial settings in southern Cameroon. *BMC infectious*  
728 *diseases* **9**, 163.
- 729 61. Antonio-Nkondjio, C., Fossog, B.T., Kopya, E., Poumachu, Y., Djantio,  
730 B.M., Ndo, C., Tchuinkam, T., Awono-Ambene, P., and Wondji, C.S.  
731 (2015). Rapid evolution of pyrethroid resistance prevalence in *Anopheles*  
732 *gambiae* populations from the cities of Douala and Yaoundé (Cameroon).  
733 *Malaria Journal* **14**, 1-9.
- 734 62. Suwanchaichinda, C., and Brattsten, L. (2001). Effects of exposure to  
735 pesticides on carbaryl toxicity and cytochrome P450 activities in *Aedes*  
736 *albopictus* larvae (Diptera: Culicidae). *Pesticide Biochemistry and*  
737 *Physiology* **70**, 63-73.
- 738 63. David, J.-P., Coissac, E., Melodelima, C., Poupardin, R., Riaz, M.A.,  
739 Chandor-Proust, A., and Reynaud, S. (2010). Transcriptome response to  
740 pollutants and insecticides in the dengue vector *Aedes aegypti* using next-  
741 generation sequencing technology. *BMC Genomics* **11**, 216.
- 742 64. Poupardin, R., Riaz, M.A., Jones, C.M., Chandor-Proust, A., Reynaud, S.,  
743 and David, J.-P. (2012). Do pollutants affect insecticide-driven gene  
744 selection in mosquitoes? Experimental evidence from transcriptomics.  
745 *Aquatic Toxicology* **114**, 49-57.
- 746 65. Mueller, P., Chouaibou, M., Pignatelli, P., Etang, J., Walker, E.D.,  
747 Donnelly, M.J., Simard, F., and Ranson, H. (2008). Pyrethroid tolerance is  
748 associated with elevated expression of antioxidants and agricultural

- 749 practice in *Anopheles arabiensis* sampled from an area of cotton fields in  
750 Northern Cameroon. *Molecular Ecology* 17, 1145-1155.
- 751 66. United Nations, D.o.E.a.S.A., Population Division (2014). World  
752 Urbanization Prospects: The 2014 Revision, Highlights.  
753 (ST/ESA/SER.A/352).
- 754 67. Donnelly, M.J., McCall, P., Lengeler, C., Bates, I., D'Alessandro, U.,  
755 Barnish, G., Konradsen, F., Klinkenberg, E., Townson, H., and Trape, J.-  
756 F. (2005). Malaria and urbanization in sub-Saharan Africa. *Malar J* 4, 12.
- 757 68. Robert, V., Macintyre, K., Keating, J., Trape, J.-F., Duchemin, J.-B.,  
758 Warren, M., and Beier, J.C. (2003). Malaria transmission in urban sub-  
759 Saharan Africa. *The American Journal of Tropical Medicine and Hygiene*  
760 68, 169-176.
- 761 69. Keiser, J., Utzinger, J., De Castro, M.C., Smith, T.A., Tanner, M., and  
762 Singer, B.H. (2004). Urbanization in sub-saharan Africa and implication for  
763 malaria control. *The American Journal of Tropical Medicine and Hygiene*  
764 71, 118-127.
- 765 70. De Silva, P.M., and Marshall, J.M. (2012). Factors contributing to urban  
766 malaria transmission in sub-Saharan Africa: a systematic review. *Journal*  
767 *of tropical medicine* 2012.
- 768 71. Weill, M., Chandre, F., Brengues, C., Manguin, S., Akogbeto, M., Pasteur,  
769 N., Guillet, P., and Raymond, M. (2000). The kdr mutation occurs in the  
770 Mopti form of *Anopheles gambiae* s.s. through introgression. *Insect Mol*  
771 *Biol* 9, 451-455.

- 772 72. Windbichler, N., Menichelli, M., Papathanos, P.A., Thyme, S.B., Li, H.,  
773 Ulge, U.Y., Hovde, B.T., Baker, D., Monnat, R.J., Jr., Burt, A., et al.  
774 (2011). A synthetic homing endonuclease-based gene drive system in the  
775 human malaria mosquito. *Nature* 473, 212-215.
- 776 73. Service, M.W. (1993). *Mosquito Ecology. Field Sampling Methods*, 2nd  
777 ed., (London: Elsevier Applied Science Publishers, Ltd.).
- 778 74. Gimnig, J.E., Walker, E.D., Otieno, P., Kosgei, J., Olang, G., Ombok, M.,  
779 Williamson, J., Marwanga, D., Abong'o, D., and Desai, M. (2013).  
780 Incidence of malaria among mosquito collectors conducting human  
781 landing catches in western Kenya. *The American Journal of Tropical*  
782 *Medicine and Hygiene* 88, 301-308.
- 783 75. Gillies, M.T., and De Meillon, B. (1968). *The Anophelinae of Africa South*  
784 *of the Sahara*, 2nd Edition, (Johannesburg: South African Institute for  
785 Medical Research).
- 786 76. Fanello, C., Santolamazza, F., and della Torre, A. (2002). Simultaneous  
787 identification of species and molecular forms of the *Anopheles gambiae*  
788 complex by PCR-RFLP. *Med Vet Entomol* 16, 461-464.
- 789 77. Turissini, D.A., Gamez, S., and White, B.J. (2014). Genome-wide patterns  
790 of polymorphism in an inbred line of the African malaria mosquito  
791 *Anopheles gambiae*. *Genome biology and evolution* 6, 3094-3104.
- 792 78. Purcell, S., Neale, B., Todd-Brown, K., Thomas, L., Ferreira, M.A.,  
793 Bender, D., Maller, J., Sklar, P., De Bakker, P.I., and Daly, M.J. (2007).

- 794 PLINK: a tool set for whole-genome association and population-based  
795 linkage analyses. *The American Journal of Human Genetics* *81*, 559-575.
- 796 79. Paradis, E., Claude, J., and Strimmer, K. (2004). APE: analyses of  
797 phylogenetics and evolution in R language. *Bioinformatics* *20*, 289-290.
- 798 80. Jombart, T. (2008). adegenet: a R package for the multivariate analysis of  
799 genetic markers. *Bioinformatics* *24*, 1403-1405.
- 800 81. Jakobsson, M., and Rosenberg, N.A. (2007). CLUMPP: a cluster matching  
801 and permutation program for dealing with label switching and  
802 multimodality in analysis of population structure. *Bioinformatics* *23*, 1801-  
803 1806.
- 804 82. Rosenberg, N.A. (2004). DISTRUCT: a program for the graphical display  
805 of population structure. *Mol Ecol Notes* *4*, 137-138.
- 806 83. Plotree, D., and Plotgram, D. (1989). PHYLIP-phylogeny inference  
807 package (version 3.2). *cladistics* *5*, 163-166.
- 808 84. Fumagalli, M., Vieira, F.G., Linderoth, T., and Nielsen, R. (2014).  
809 ngsTools: methods for population genetics analyses from next-generation  
810 sequencing data. *Bioinformatics* *30*, 1486-1487.
- 811 85. Meirmans, P.G., and Van Tienderen, P.H. (2004). GENOTYPE and  
812 GENODIVE: two programs for the analysis of genetic diversity of asexual  
813 organisms. *Mol Ecol Notes* *4*, 792-794.
- 814 86. Huang, D.W., Sherman, B.T., and Lempicki, R.A. (2008). Systematic and  
815 integrative analysis of large gene lists using DAVID bioinformatics  
816 resources. *Nature protocols* *4*, 44-57.
- 817



818 FIGURE LEGENDS

819 **Figure 1. *Anopheles gambiae* complex sibling species are genetically**  
820 **distinct.** A) PCA B) NJ Tree, and C) fastSTRUCTURE analyses clearly separate  
821 the four *An. gambiae* complex species that occur in Cameroon into discrete  
822 genetic clusters. Additional subdivision below the species level is apparent within  
823 *An. coluzzii* and *An. gambiae*. D) Species composition varies dramatically  
824 between eco-geographic regions. Sampling sites are denoted by black dots.

825

826 **Figure 2. *Anopheles gambiae* is divided into three cryptic subpopulations.**  
827 A) PCA, B) NJ Tree, and C) fastSTRUCTURE analyses reveal subdivision within  
828 *An. gambiae*. We term the most abundant group *GAM1*, while a second small,  
829 but widely distributed group, is termed *GAM2*. Finally, most individuals from the  
830 village of Nkolondom are genetically distinct from other *An. gambiae* suggestive  
831 of local adaptation.

832

833 **Figure 3. *Anopheles coluzzii* is divided into four subgroups.** A) PCA, NJ  
834 Tree, and C) fastSTRUCTURE reveal major population structuring between *An.*  
835 *coluzzii* from the northern Savannah eco-geographic region and *An. coluzzii* from  
836 the southern three forested regions. Within the south, D) PCA, E) NJ Tree, and  
837 F) fastSTRUCTURE analyses separate mosquitoes based on geographic origin,  
838 although clustering is not fully discrete indicating a dynamic interplay between  
839 local adaptation and migration.

840

841 **Figure 4. Phylogenetic relationships between populations show recent**  
842 **radiation within *An. gambiae* and *An. coluzzii* clades.** In an unrooted,  $F_{ST}$ -  
843 based NJ tree, *An. melas* is most distant from all other species, while *An.*  
844 *gambiae* and *An. coluzzii* are sister species. Southern populations of *An. coluzzii*  
845 are more closely related to each other than to the northern savannah population.  
846 In contrast to geographic distance, the Douala subpopulation is genetically closer  
847 to Yaoundé rather than Coastal mosquitoes. Within *An. gambiae*, a relatively  
848 deep split is present between *GAM2* and *GAM1*, while *Nkolondom* appears to  
849 have recently diverged from *GAM1*.

850

851 **Figure 5. Genome scans reveal footprints of global and local adaptation in**  
852 ***An. gambiae* subpopulations.** A-C) Diversity and Tajima's  $D$  are plotted for  
853 each of three subpopulations. A dashed line marks the 1<sup>st</sup> percentile empirical  
854 distribution of Tajima's  $D$ . In all populations, concordant dips in diversity and  
855 Tajima's  $D$  are evident near the pericentromeric region of 2L where the *para*  
856 sodium channel gene is located. A population-specific sweep in *Nkolondom* is  
857 present at ~34 Mb on 2L. D-E) Both absolute ( $d_{xy}$ ) and relative ( $F_{ST}$ ) divergence  
858 between populations are plotted with a dashed line marking the 99<sup>th</sup> percentile  
859 distribution of  $F_{ST}$ . An increase in  $F_{ST}$  between *GAM1-Nkolondom* occurs at the  
860 *Nkolondom*-specific 2L sweep.

861

862 **Figure 6. Strong positive selection acts on xenobiotic resistance loci in**  
863 **subpopulations of *An. coluzzii*.** A-D) Sharp declines in diversity and allele

864 frequency spectrum at the *para* sodium channel gene are present in all  
865 populations. A sweep centered on the resistance to dieldrin (*rdl*) gene is present  
866 in southern subpopulations, while a dramatic sweep encompassing a cluster of  
867 detoxification genes on 3R is limited to urban mosquitoes. E-G) No evidence for  
868 locally elevated divergence is observed at the *para* or *rdl* loci suggesting a  
869 shared sweep amongst populations. In contrast, urban-rural mosquitoes show  
870 extreme levels of divergence at the detoxification-enriched sweep on 3R.

871

872 **Figure 7. Spatially varying selection between urban and coastal**

873 **populations.** For each of the three southern *An. coluzzii* subpopulations, 80  
874 reconstructed haplotypes are visualized by color-coding 28 bi-allelic SNPs in the  
875 3R GSTE/CYP450 sweep either grey or white. A single invariant haplotype -- all  
876 grey SNPs -- is common in (A) Yaoundé, less so in (B) Douala, and very rare in  
877 (C) coastal populations. D-E) Similarly, in PCA and NJ Tree analysis of the  
878 same 28 SNPs, coastal individuals (navy blue) are diffuse across genotypic  
879 space, while Yaounde mosquitoes (purple) are tightly clustered. As expected,  
880 Douala (pink) exhibits an intermediate degree of variation. F) STRUCTURE  
881 analysis based solely on the 28 SNPs within the sweep shows clear distinctions  
882 between the three populations.

883

884

885

886

887 SUPPLEMENTAL FIGURE LEGENDS

888 **Figure S1.** Bayesian information criterion was used to determine the most likely  
889 number of clusters/populations for A) all 941 samples, B) all *An. coluzzii*, C) *An.*  
890 *coluzzii* from the northern savannah, D) *An. arabiensis*, E) the 309 individuals  
891 used for genome scans F) all *An. gambiae*, G) southern *An. coluzzii*, and H) *An.*  
892 *melas*. BIC scores for 1 to 50 clusters are plotted. The lower the BIC score the  
893 better the model fits the observed genetic diversity.

894

895 **Figure S2.** Southern (pale pink) and northern populations (deep pink) of *An.*  
896 *coluzzii* are readily separated in PCA (top) and NJ trees (bottom) using SNPs  
897 exclusively from any of the five chromosomal arms.

898

899 **Figure S3.** No population substructure is detectable within northern *An. coluzzii*  
900 using PCA and NJ tree analysis.

901

902 **Figure S4.** Mean sequencing coverage per individual is plotted in 300kb non-  
903 overlapping windows across the genome. Only individuals used in the genome  
904 scans are included in the coverage calculation.

Figure 1.

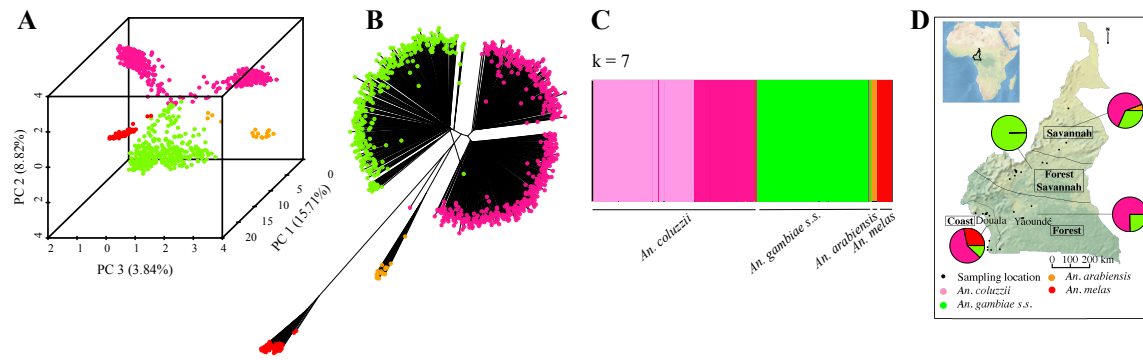

Figure 2.

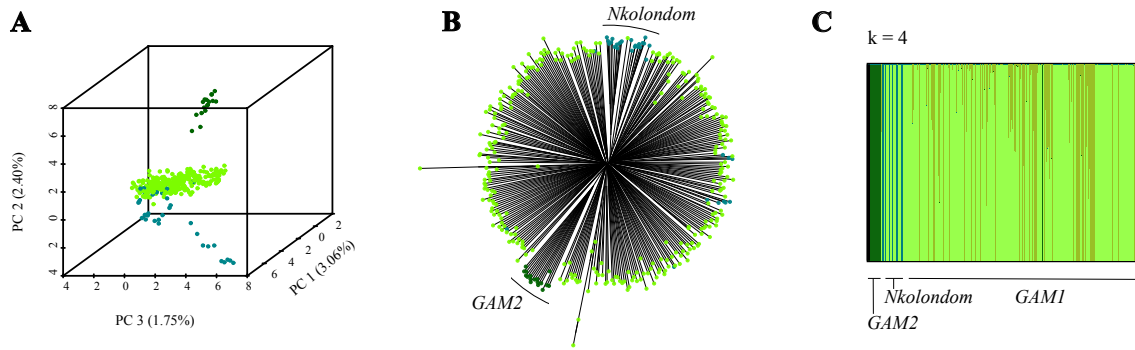

Figure 3.

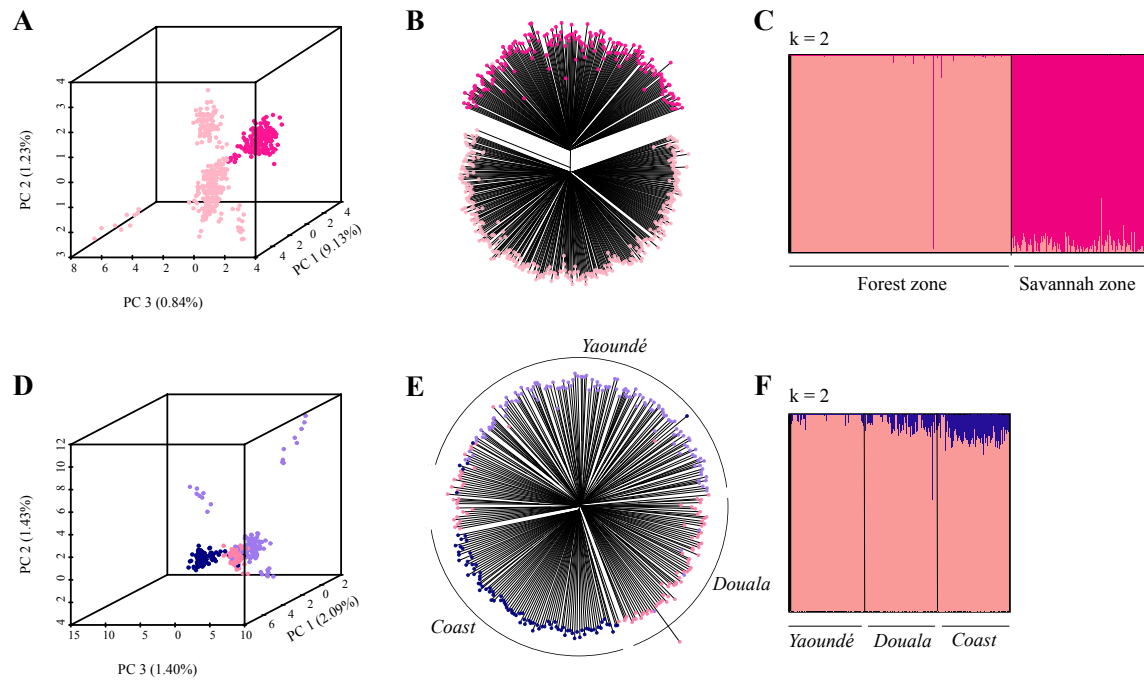

Figure 4.

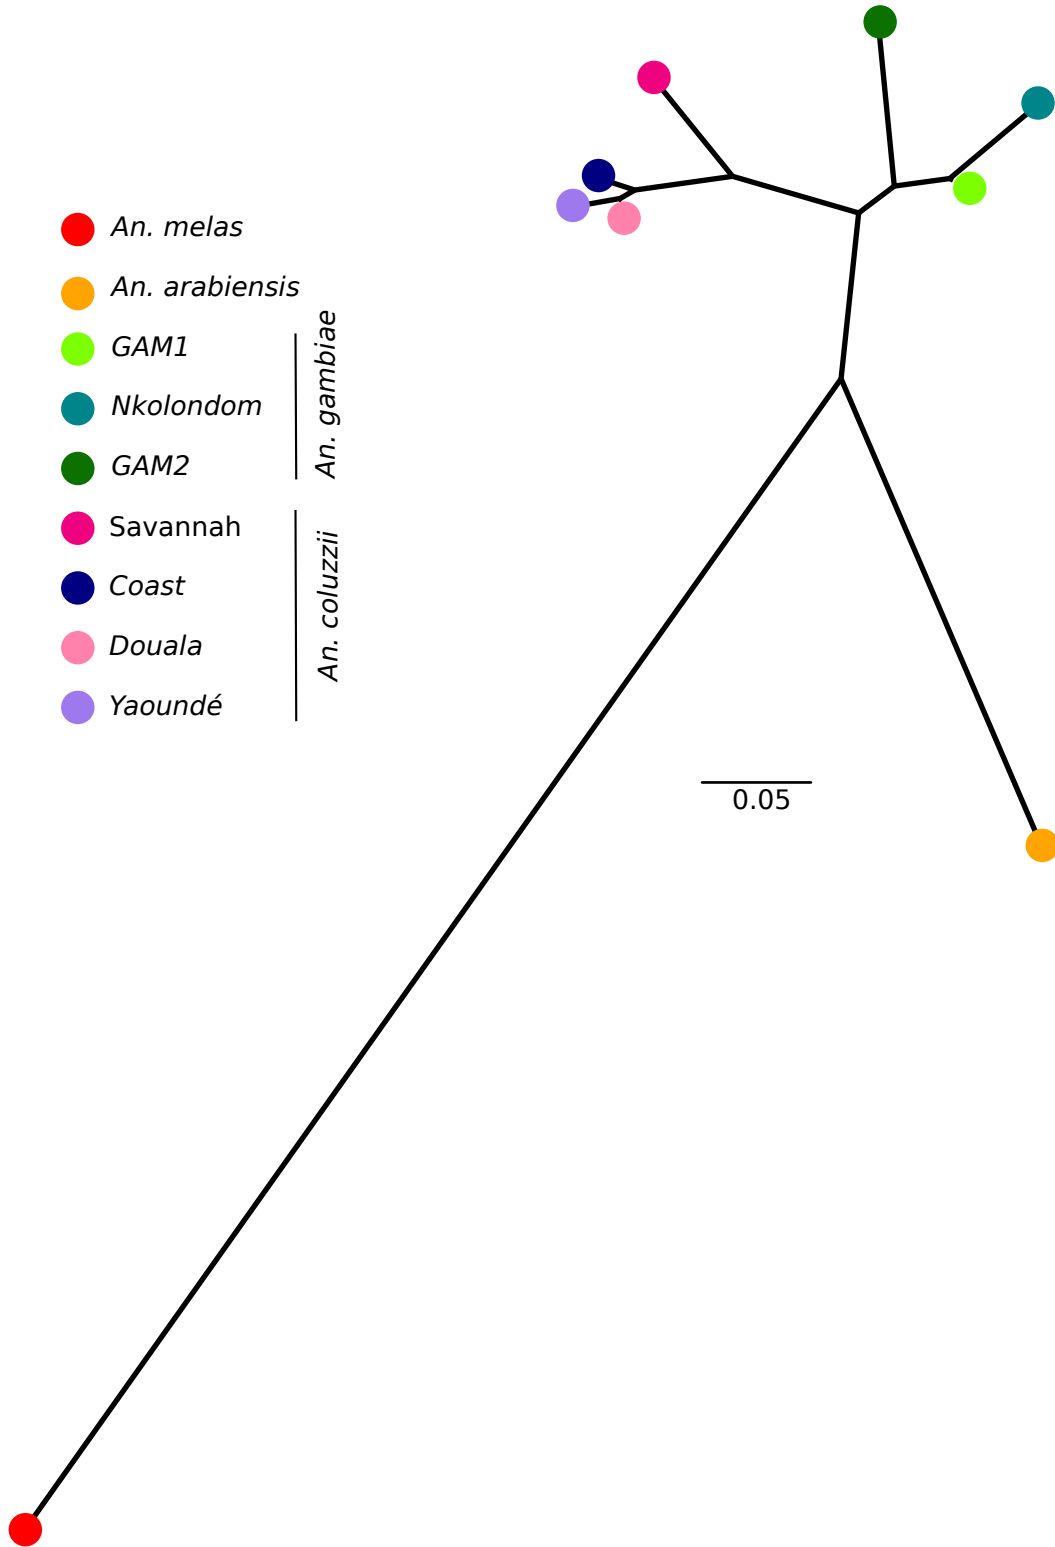



Figure 5.

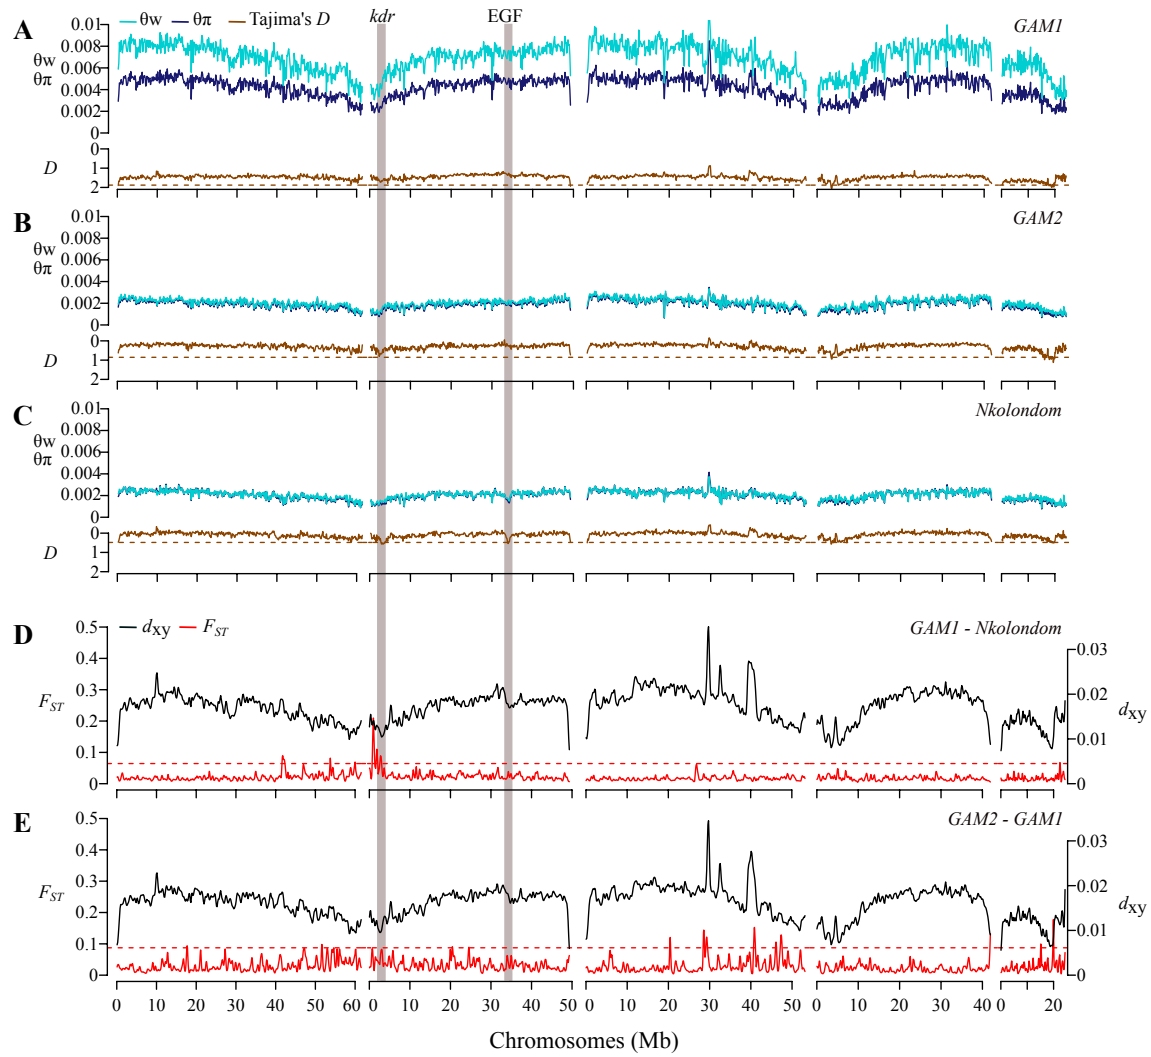

Figure 6.

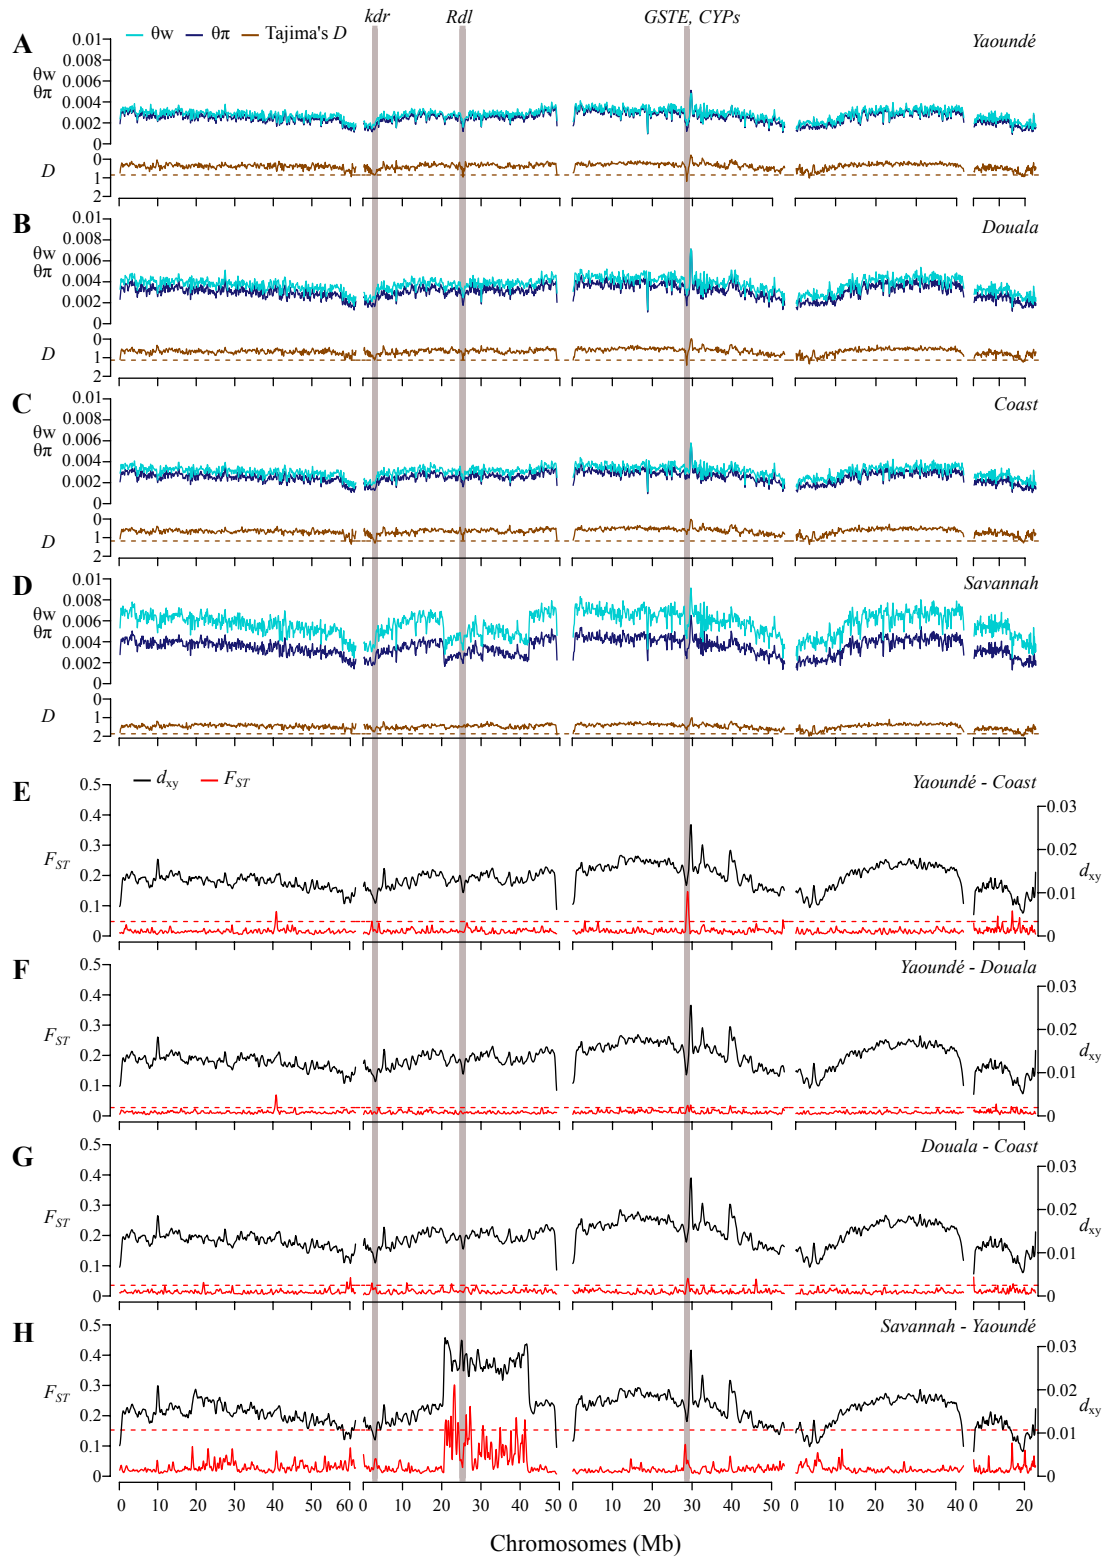

Figure 7.

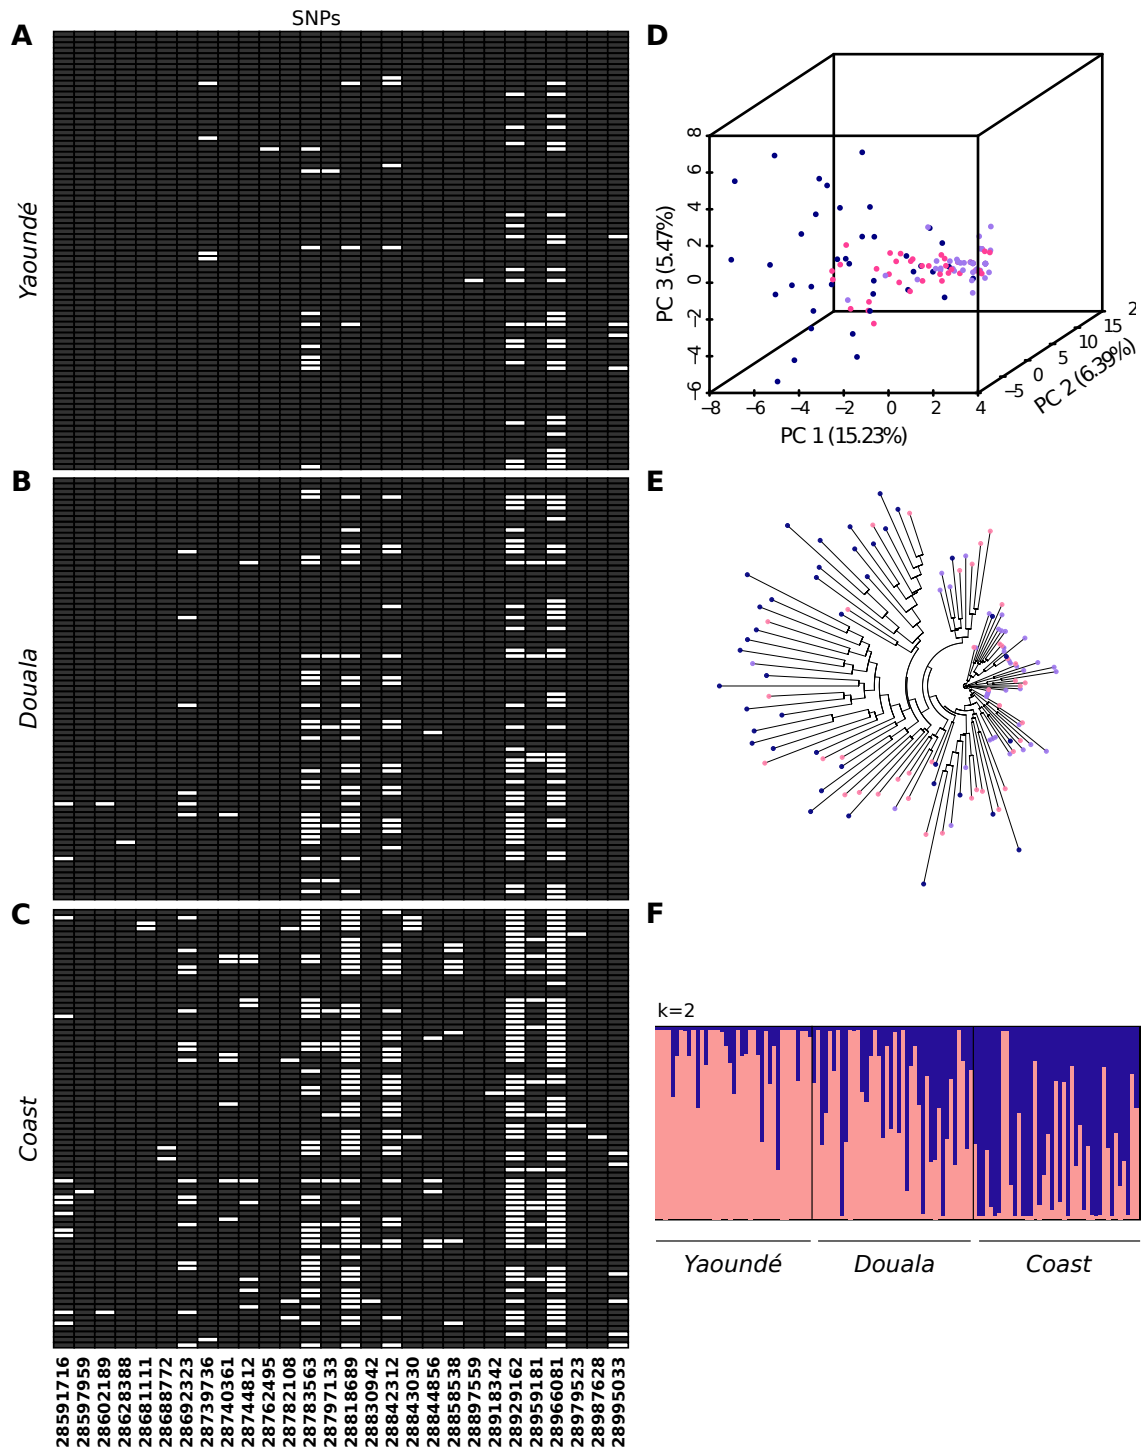

Figure S1.

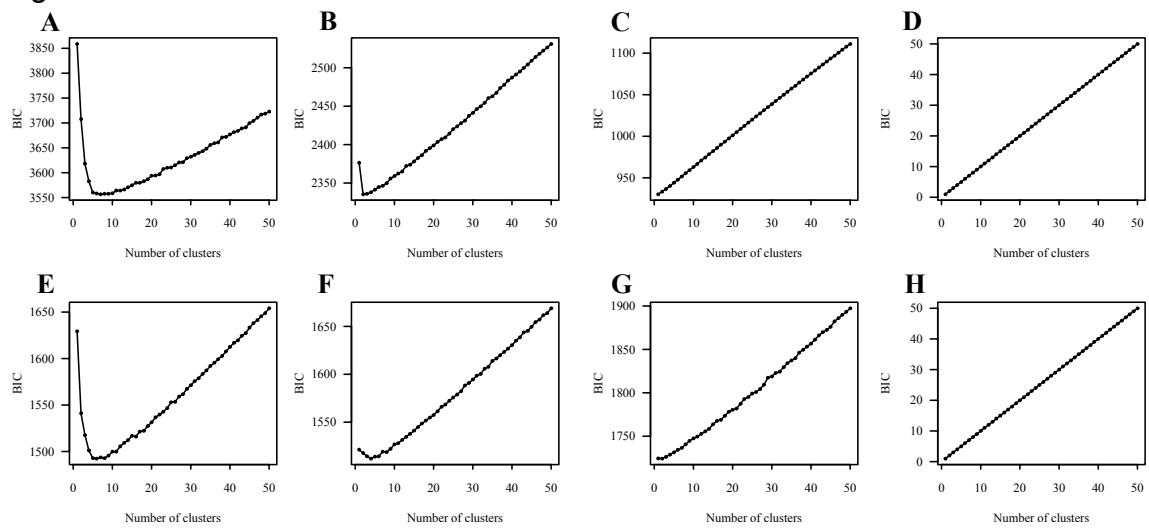

Figure S2.

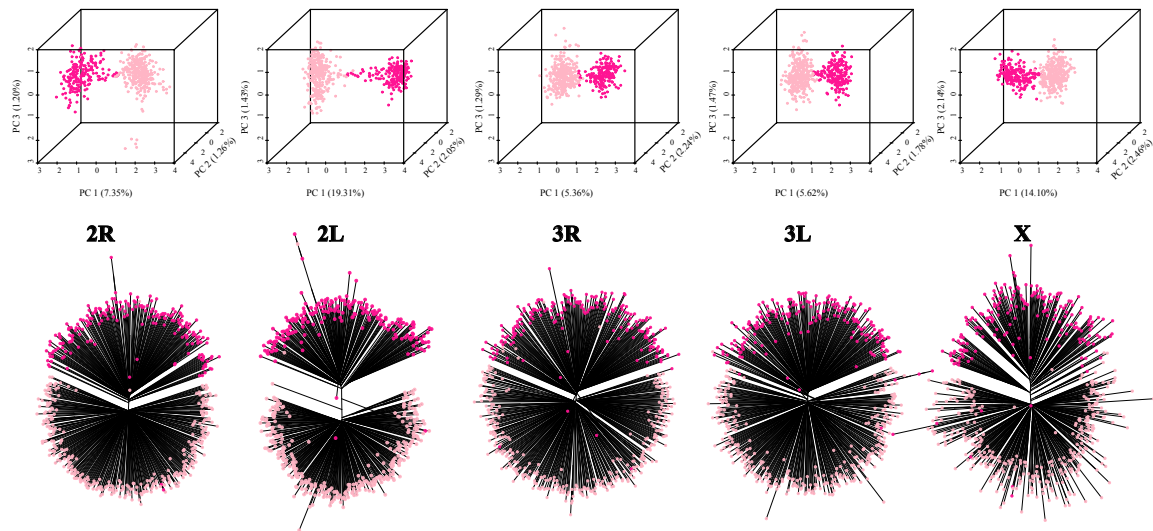

Figure S3.

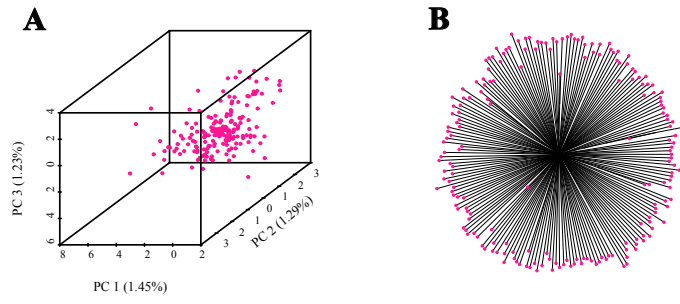

Figure S4.

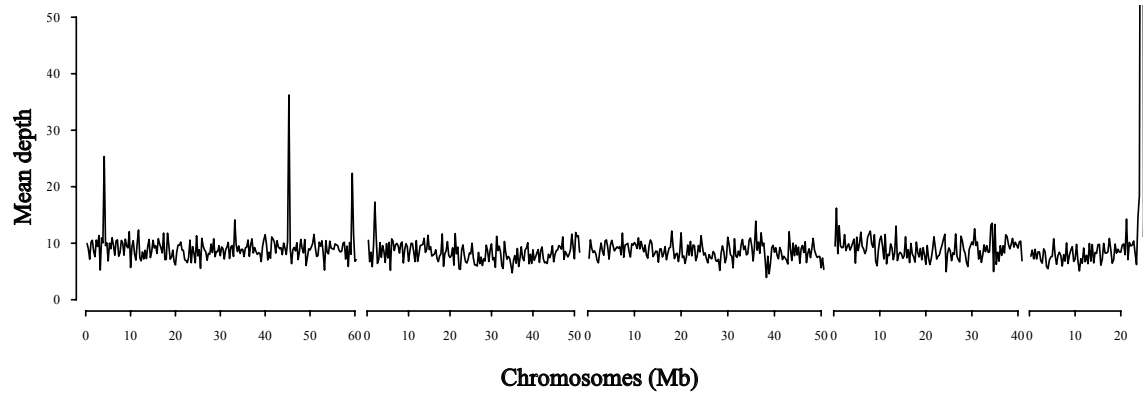

1 SUPPLEMENTAL INFORMATION

2

3 Consistently negative Tajima's  $D$  across all subgroups may reflect recent

4 population expansions. To further address this hypothesis we modeled the

5 demographic history of each population using a diffusion-based approach

6 implemented in the software package  $\partial a \partial i$  v 1.6.3 (1). We fit four alternative

7 demographic models (*neutral*, *growth*, *two-epoch*, *bottle-growth*), without

8 migration or recombination, to the folded allele frequency spectrum of each

9 cryptic subgroup of *An. gambiae s.s.* and *An. coluzzii*. The best model was

10 selected based on the highest composite log likelihood, the lowest Akaike

11 Information Criterion (AIC), and visual inspection of residuals. As the choice of

12 model can be challenging in recently diverged populations, we prioritized the

13 simplest model when we found it difficult to discriminate between conflicting

14 models. To obtain uncertainty estimates for the demographic parameters we

15 used the built-in bootstrap function implemented in  $\partial a \partial i$  to derive 95% bootstrap

16 confidence intervals.

17 Results indicate that GAM1, GAM2, and Savannah populations have

18 experienced recent size increases. However, for the southern populations of

19 *Yaoundé*, *Coast*, *Douala*, and *Nkolondom* the best demographic model is a

20 *bottle-growth* (Table S4). While most classical studies report *An. gambiae s.l.*

21 populations that are in expansion (e.g. 2), a more recent study employing RAD

22 markers revealed that some East African populations have more complex

23 demographic histories, often involving several changes in effective population

24 size ( $N_e$ ) as we observed in southern forest populations of both *An. coluzzii* and



25 *An. gambiae*. It has also been shown that *Anopheles* mosquitoes can experience  
26 drastic declines in  $N_e$  due to insecticidal campaigns (3). Such events affect  
27 demographic parameters and could be a plausible explanation for the difficulty  
28 we encountered in distinguishing between *bottle-growth* and *two-epoch* models  
29 in some populations.  
30

31 SUPPLEMENTAL REFERENCES

- 32 1. Gutenkunst RN, Hernandez RD, Williamson SH, Bustamante CD (2009)  
33 Inferring the joint demographic history of multiple populations from  
34 multidimensional SNP frequency data. *PLoS Genet* 5(10):e1000695.
- 35 2. Donnelly MJ, Licht MC, Lehmann T (2001) Evidence for recent population  
36 expansion in the evolutionary history of the malaria vectors *Anopheles*  
37 *arabiensis* and *Anopheles gambiae*. *Mol Biol Evol* 18(7):1353–1364.
- 38 3. Athrey G, et al. (2012) The effective population size of malaria mosquitoes:  
39 large impact of vector control. *PLoS Genet* 8(12):e1003097.

**Table S1.** Locations of *An. gambiae s.l.* mosquitoes sequenced in Cameroon

| Ecogeographic regions | Village Name                 | Geographic coordinates | Sampling methods |        |     |       | Total |
|-----------------------|------------------------------|------------------------|------------------|--------|-----|-------|-------|
|                       |                              |                        | HLC-OUT          | HLC-IN | LC  | SPRAY |       |
| Savannah              | Lagdo                        | 9°02'56"N, 13°39'22"E  | 52               | 27     | 21  | 43    | 143   |
|                       | Lougga Tabadi                | 7°06'36"N, 13°12'36"E  | 2                | 0      | 0   | 0     | 2     |
|                       | Malang Dang                  | 7°26'06"N, 13°33'14"E  | 0                | 0      | 0   | 11    | 11    |
|                       | Ngao Bella                   | 6°30'04"N, 12°25'34"E  | 28               | 17     | 0   | 69    | 114   |
|                       | Paniéré Tibati               | 6°28'08"N, 12°37'44"E  | 5                | 0      | 22  | 16    | 43    |
|                       | Total                        |                        | 87               | 44     | 43  | 139   | 313   |
| F-S Transition        | Makoupa Bord                 | 6°06'06"N, 11°11'29"E  | 2                | 0      | 0   | 16    | 18    |
|                       | Makoupa Le Grand             | 6°02'28"N, 11°10'39"E  | 0                | 0      | 4   | 10    | 14    |
|                       | Manchoutvi                   | 5°52'48"N, 11°06'36"E  | 0                | 0      | 70  | 0     | 70    |
|                       | Manda                        | 5°43'32"N, 10°52'06"E  | 1                | 2      | 0   | 33    | 36    |
|                       | Mante Le Grand               | 6°03'44"N, 11°12'18"E  | 0                | 0      | 0   | 8     | 8     |
|                       | Mfelap                       | 5°43'32"N, 10°52'06"E  | 0                | 0      | 0   | 8     | 8     |
|                       | Mgbandji                     | 6°05'49"N, 11°08'26"E  | 0                | 0      | 3   | 5     | 8     |
|                       | Mouinkoing                   | 6°02'56"N, 11°24'36"E  | 0                | 0      | 0   | 3     | 3     |
| Total                 |                              | 3                      | 2                | 77     | 83  | 165   |       |
| Forest (urban)        | Bepanda Omnisport (Douala)   | 4°03'18"N, 9°43'16"E   | 0                | 0      | 7   | 0     | 7     |
|                       | Beti Makéfé (Douala)         | 4°03'54"N, 9°45'40"E   | 0                | 0      | 25  | 0     | 25    |
|                       | Bomono Gare (Douala)         | 4°04'55"N, 9°35'35"E   | 0                | 0      | 13  | 0     | 13    |
|                       | PK10 (Douala)                | 4°02'49"N, 9°46'47"E   | 0                | 0      | 20  | 0     | 20    |
|                       | Missolé 2 (Douala)           | 3°59'17"N, 9°54'22"E   | 0                | 0      | 8   | 0     | 8     |
|                       | Ndobo Bonabéri (Douala)      | 4°04'39"N, 9°40'12"E   | 0                | 0      | 1   | 0     | 1     |
|                       | Sable (Douala)               | 4°04'52"N, 9°43'34"E   | 28               | 0      | 5   | 0     | 33    |
|                       | Village Petit Mobil (Douala) | 4°00'16"N, 9°45'18"E   | 1                | 0      | 16  | 0     | 17    |
|                       | Nkolbisson (Yaoundé)         | 3°52'29"N, 11°26'58"E  | 0                | 0      | 9   | 0     | 9     |
|                       | Nkolondom (Yaoundé)          | 3°58'20"N, 11°30'56"E  | 0                | 0      | 48  | 0     | 48    |
|                       | Tsinga Elobi (Yaoundé)       | 3°52'49"N, 11°30'23"E  | 0                | 0      | 46  | 0     | 46    |
|                       | Combattant (Yaoundé)         | 3°52'36"N, 11°30'46"E  | 18               | 0      | 48  | 0     | 66    |
|                       | Total                        |                        | 47               | 0      | 246 | 0     | 293   |
| Forest (rural)        | Mbébé                        | 4°10'00"N, 11°04'00"E  | 0                | 0      | 0   | 5     | 5     |
|                       | Nyabessan Centre             | 2°24'00"N, 10°24'00"E  | 4                | 1      | 0   | 0     | 5     |
|                       | Oveng                        | 2°44'00"N, 11°27'00"E  | 1                | 0      | 0   | 0     | 1     |
|                       | Total                        |                        | 5                | 1      | 0   | 5     | 11    |

---

|       |              |                      |     |    |     |     |     |
|-------|--------------|----------------------|-----|----|-----|-----|-----|
| Coast | Afan Essokyé | 2°22'01"N, 9°58'59"E | 1   | 0  | 0   | 13  | 14  |
|       | Bouanjo      | 2°48'00"N, 9°54'00"E | 0   | 0  | 5   | 0   | 5   |
|       | Campo        | 2°22'01"N, 9°49'01"E | 48  |    | 16  | 27  | 91  |
|       | Ebodjé       | 2°30'00"N, 9°49'05"E | 35  | 4  | 0   | 3   | 42  |
|       | Mutengéné    | 4°06'53"N, 9°14'51"E | 0   | 0  | 7   | 0   | 7   |
|       | Total        |                      | 84  | 4  | 28  | 43  | 159 |
| Total |              |                      | 226 | 51 | 394 | 270 | 941 |

HLC-OUT, human landing catches performed outdoor; HLC-IN, human landing catches performed indoor; LC, larval collection; SPRAY, spray catches.

---

**Table S2.** Pairwise comparison of genetic distance ( $F_{ST}$ ) among cryptic subgroups and sibling species of *An. gambiae s.l.*

| $F_{ST}$              | <i>Yaoundé</i> | <i>Douala</i> | <i>Coast</i> | <i>Savannah</i> | <i>GAM2</i> | <i>Nkolondom</i> | <i>GAM1</i> | <i>An. arabiensis</i> |
|-----------------------|----------------|---------------|--------------|-----------------|-------------|------------------|-------------|-----------------------|
| <i>Yaoundé</i>        | -              |               |              |                 |             |                  |             |                       |
| <i>Douala</i>         | 0.016          | -             |              |                 |             |                  |             |                       |
| <i>Coast</i>          | 0.035          | 0.023         | -            |                 |             |                  |             |                       |
| <i>Savannah</i>       | 0.127          | 0.109         | 0.103        | -               |             |                  |             |                       |
| <i>GAM2</i>           | 0.244          | 0.199         | 0.230        | 0.168           | -           |                  |             |                       |
| <i>Nkolondom</i>      | 0.197          | 0.201         | 0.200        | 0.247           | 0.161       | -                |             |                       |
| <i>GAM1</i>           | 0.183          | 0.153         | 0.178        | 0.188           | 0.090       | 0.050            | -           |                       |
| <i>An. arabiensis</i> | 0.451          | 0.406         | 0.498        | 0.383           | 0.478       | 0.372            | 0.327       | -                     |
| <i>An. melas</i>      | 0.851          | 0.836         | 0.830        | 0.792           | 0.841       | 0.818            | 0.781       | 0.872                 |

**Table S3.** Average nucleotide diversity in seven cryptic subgroups of *An. coluzzii* and *An. gambiae s.s.*

| <b>Population</b> | <b><math>\theta\pi</math> (bp<sup>-1</sup>)</b> | <b><math>\theta w</math> (bp<sup>-1</sup>)</b> |
|-------------------|-------------------------------------------------|------------------------------------------------|
| <i>Yaoundé</i>    | 0.0025                                          | 0.0028                                         |
| <i>Douala</i>     | 0.0031                                          | 0.0037                                         |
| <i>Coast</i>      | 0.0025                                          | 0.0031                                         |
| <i>Savannah</i>   | 0.0035                                          | 0.0057                                         |
| <i>GAM2</i>       | 0.0019                                          | 0.0020                                         |
| <i>Nkolondom</i>  | 0.0020                                          | 0.0021                                         |
| <i>GAM1</i>       | 0.0042                                          | 0.0069                                         |

**Table S4.** Parameters of demographic models inferred from folded Site Frequency Spectrum (SFS) of autosomal SNPs in seven cryptic subpopulations of *An. gambiae*

| Species                       | Population      | Best Model           | Log Likelihood | Final Pop Size <sup>a</sup><br>(95% CI) | Bottleneck Size <sup>b</sup><br>(95% CI) | Time <sup>c</sup> (95% CI) |
|-------------------------------|-----------------|----------------------|----------------|-----------------------------------------|------------------------------------------|----------------------------|
| <i>Anopheles coluzzii</i>     | <i>Yaoundé</i>  | <i>Bottle-growth</i> | -83.45         | 1.18 (0.92 - 1.69)                      | 24.85 (11.94 - 125.77)                   | 0.58 (0.43 - 1.01)         |
|                               | <i>Douala</i>   | <i>Bottle-growth</i> | -84.50         | 2.20 (1.52 - 3.77)                      | 5.66 (2.80 - 142.42)                     | 0.59 (0.41 - 1.77)         |
|                               | <i>Coast</i>    | <i>Bottle-growth</i> | -82.95         | 1.72 (1.28 - 2.33)                      | 23.83 (10.95 - 128.52)                   | 0.67 (0.50 - 1.10)         |
|                               | <i>Savannah</i> | <i>Two-epoch</i>     | -102.65        | 6.73 (6.35 - 7.21)                      |                                          | 0.62 (0.54 - 0.72)         |
| <i>Anopheles gambiae s.s.</i> | <i>GAM2</i>     | <i>Two-epoch</i>     | -37.48         | 3.60 (1.74 - 7.70)                      |                                          | 3.60 (0.56 - 9.30)         |
|                               | <i>Nkolodom</i> | <i>Bottle-growth</i> | -74.92         | 1.08 (0.82 - 1.12)                      | 24.95 (47.91 - 99.84)                    | 0.63 (0.47 - 0.91)         |
|                               | <i>GAM1</i>     | <i>Two-epoch</i>     | -103.33        | 6.75 (6.33 - 7.24)                      |                                          | 0.68 (0.60 - 0.78)         |

<sup>a</sup> Ratio of contemporary to ancient population size.

<sup>b</sup> Ratio of population size after instantaneous change to ancient population size.

<sup>c</sup> Time in the past at which instantaneous change happened and growth began (in units of  $2*N_a$  generations).
